# Supplementary material for: Biomimetic studies towards the cardinalins: synthesis of (+)-ventiloquinone L and an unusual dimerisation
Source: Royal Society of Chemistry journal article supplement (doi:10.1039/b905077a), 2009-01-01

## **Biomimetic studies towards the cardinalins: Synthesis of (+)-ventiloquinone L and an unusual dimerisation.**

**Jonathan Sperry, Jimmy J. P. Sejberg, Frank M. Stiemke and Margaret A. Brimble\***

### **SUPPLEMENTARY INFORMATION**

#### **Experimental**

##### **General**

All reactions were carried out in oven-dried or flame-dried glassware under a nitrogen atmosphere unless otherwise stated. Analytical thin layer chromatography was performed using 0.2 mm Kieselgel F254 (Merck) silica plates and compounds were visualised under 365 nm ultraviolet irradiation followed by staining with either alkaline permanganate or ethanolic vanillin solution. Infrared spectra were obtained using a Perkin Elmer spectrum One Fourier Transform Infrared spectrometer as thin films between sodium chloride plates. Absorption maxima are expressed in wavenumbers ( $\text{cm}^{-1}$ ). Optical rotations were measured using a Perkin-Elmer 341 polarimeter at  $\lambda = 598 \text{ nm}$  and are given in  $10^{-1} \text{ deg cm}^2 \text{ g}^{-1}$ . Melting points were recorded on an Electrothermal melting point apparatus and are uncorrected. NMR spectra were recorded as indicated on either a Bruker DRX-400 spectrometer operating at 400 MHz for  $^1\text{H}$  nuclei and 100 MHz for  $^{13}\text{C}$  nuclei or on a Bruker Avance 300 spectrometer operating at 300 MHz and 75 MHz for  $^1\text{H}$  and  $^{13}\text{C}$  nuclei, respectively. Chemical shifts are reported in parts per million (ppm) relative to the tetramethylsilane peak recorded as  $\delta$  0.00 ppm in  $\text{CDCl}_3$ / TMS solvent, or the residual chloroform peak at  $\delta$  7.25 ppm. The  $^{13}\text{C}$  NMR values were referenced to the residual chloroform peak at  $\delta$  77.0 ppm.  $^{13}\text{C}$  NMR values are reported as chemical shift  $\delta$ , multiplicity and assignment.  $^1\text{H}$  NMR shift values are reported as chemical shift  $\delta$ , relative integral, multiplicity (s, singlet; d, doublet; t, triplet; q, quartet; m, multiplet), coupling constant ( $J$  in Hz) and assignment. Assignments are made with the aid of DEPT 135, COSY, NOESY and HSQC experiments. High resolution mass spectra were recorded on a VG-70SE mass spectrometer at a nominal accelerating voltage of 70 eV. For all microwave-assisted reactions the CEM Discover system with a circular single mode and

focused waves was used, resulting in formation of a homogeneous field pattern surrounding the sample.

### **4,6-Dimethoxy-3-oxo-1,3-dihydroisobenzofuran-1-carbonitrile 3**

Prepared from 2,4-dimethoxybenzoic acid<sup>1</sup>

### **(*S,E*)-6-(*tert*-butyldiphenylsilyloxy)hept-3-en-2-one 4**

Prepared from (*S*)-ethyl 3-hydroxybutanoate<sup>2</sup>

### **(*S*)-1-(3-(2-(*tert*-butyldiphenylsilyloxy)propyl)-1,4,6,8-tetramethoxynaphthalen-2-yl)ethanone 5**

To a solution of potassium *tert*-butoxide (35 mg, 0.31 mmol) in distilled DMSO (0.7 mL) was added a solution of 4,6-dimethoxy-3-oxo-1,3-dihydroisobenzofuran-1-carbonitrile **3** (58 mg, 0.26 mmol) in distilled DMSO (0.7 mL) followed by a solution of (*S,E*)-6-(*tert*-butyldiphenylsilyloxy)hept-3-en-2-one **4** (87 mg, 0.24 mmol) in distilled DMSO (1.1 mL). The reaction mixture was stirred for 4 min then diluted with diethyl ether (7 mL) and quenched upon addition of a saturated aqueous solution of ammonium chloride (7 mL). The resulting mixture was partitioned between diethyl ether and ammonium chloride and the aqueous layer extracted with diethyl ether (3 x 15 mL). The combined organic extracts were washed with water (3 x 10 mL), dried over anhydrous magnesium sulfate, filtered and concentrated *in vacuo*. The resulting residue was taken up in THF (4 mL) and water (1.5 mL) and tetrabutylammonium bromide (8 mg, 0.025 mmol) was added. The reaction vessel was evacuated and filled with hydrogen repeatedly. A solution of sodium dithionite (270 mg, 1.55 mmol) in water (1.5 mL) was then added and the reaction mixture was stirred for 1 h under an atmosphere of hydrogen. A solution of sodium hydroxide (215 mg, 5.38 mmol) in water (2.2 mL) was added followed by dimethylsulfate (0.50 mL, 667 mg, 5.28 mmol). The reaction mixture was stirred at r.t. for 3 h under an atmosphere of hydrogen. Water (4 mL) and ethyl acetate (15 mL) were added and the layers separated. The aqueous layer was extracted with ethyl acetate (3 x 15 mL). The combined organic extracts were dried over anhydrous magnesium sulfate, filtered and concentrated *in vacuo*. The resulting residue was purified by flash chromatography eluting with hexanes-ethyl acetate (95:5) to afford the *title compound 5* (72 mg, 0.12 mmol, 52%) as a yellow oil;  $[\alpha]_D^{25} +5.6$  (*c* 0.41, CH<sub>2</sub>Cl<sub>2</sub>);  $\nu_{\max}$  (oil)/cm<sup>-1</sup> 3378, 2931, 2855, 1693, 1618, 1580, 1464, 1427, 1407, 1380,

1338, 1245, 1208, 1153, 1105;  $\delta_{\text{H}}$  (300 MHz,  $\text{CDCl}_3$ ) 0.99 (9 H, s,  $\text{C}(\text{Me})_3$ ), 1.05 (3 H, d,  $J$  3.6, Me), 2.42 (3 H, s, Me), 2.79 (1 H, dd,  $J$  7.7 and 13.5,  $\text{CHH}$ ), 3.02 (1 H, dd,  $J$  6.6 and 13.5,  $\text{CHH}$ ), 3.68 (3 H, s, OMe), 3.70 (3 H, s, OMe), 3.92 (3 H, s, OMe), 3.97 (3 H, s, OMe), 4.26 (1 H, m, CH), 6.53 (1 H, d,  $J$  2.1, Ar-H), 6.91 (1 H, d,  $J$  2.1, Ar-H), 7.27 (2 H, m, Ar-H), 7.29 (4 H, m, Ar-H), 7.56 (2 H, dd,  $J$  1.4 and 8.0, Ar-H), 7.65 (2 H, m, Ar-H);  $\delta_{\text{C}}$  (75 MHz,  $\text{CDCl}_3$ ) 19.1 (C-Si), 23.3 ( $\text{CHMe}$ ), 27.0 ( $\text{C}(\text{Me})_3$ ), 33.1 ( $\text{C}(\text{O})\text{Me}$ ), 37.2 ( $\text{CH}_2$ ), 55.4 (OMe), 56.1 (OMe), 60.7 (OMe), 63.7 (OMe), 69.5 (CH), 93.3 (CH), 99.1 (CH), 115.2 (C), 125.5 (C), 127.4 (4 x CH), 129.4 (2 x CH), 132.2 (C), 132.9 (C), 134.4 (2 x C), 135.86 (2 x CH), 135.92 (2 x CH), 149.5 (C), 150.3 (C), 157.7 (C), 159.1 (C), 205.8 (C=O);  $m/z$  (EI+) 586 (12%,  $\text{M}^+$ ) 529 (100), 514 (32), 512 (15), 330 (10), 313 (30), 282 (19), 199 (75), 197 (34), 181 (12), 135 (90), 77 (13), 57 (21); HRMS (EI+,  $\text{M}^+$ ) found 586.2742, calc. for  $\text{C}_{35}\text{H}_{42}\text{O}_6\text{Si}$  586.2751.

**(1R,3S)-7,9,10-trimethoxy-1,3-dimethyl-3,4-dihydro-1H-benzo[glisochromen-5-ol 7**

(*S*)-1-(3-(2-(*tert*-butyldiphenylsilyloxy)propyl)-1,4,6,8-tetramethoxynaphthalen-2-yl)ethanone **5** (150 mg, 0.26 mmol) was taken up in distilled THF (9 mL) and tetra-*n*-butylammonium fluoride (1 M in pentane, 2.5 mL, 2.5 mmol) was added. The reaction mixture was stirred for 4 days at r.t. under an atmosphere of nitrogen. The solvents were removed *in vacuo*, and the residue flushed through a plug of silica eluting with hexanes-ethyl acetate (2:3) and the filtrate concentrated *in vacuo*. The resulting lactol **6** was taken up in distilled dichloromethane (9 mL) and cooled to  $-78^\circ\text{C}$ . Trifluoroacetic acid (0.12 mL, 180 mg, 1.58 mmol) was added and the reaction mixture stirred for 15 min before the addition of triethylsilane (0.24 mL, 173 mg, 1.49 mmol). The reaction mixture was then allowed to reach r.t. over 20 h. Water (40 mL) was added and the aqueous layer was extracted with ethyl acetate (40 mL x 3). The combined organic extracts were dried over anhydrous magnesium sulfate, filtered, concentrated *in vacuo* and the resulting residue was purified by flash chromatography eluting with hexanes-ethyl acetate (4:1) to give the *title compound 7* as a cream coloured solid (55 mg, 0.17 mmol, 65%); m.p.  $75-76^\circ\text{C}$ ;  $[\alpha]_{\text{D}}^{25} +65.6$  (c 0.44,  $\text{CH}_2\text{Cl}_2$ );  $\nu_{\text{max}}$  (neat)/ $\text{cm}^{-1}$  3364, 2967, 2930, 2837, 1735, 1620, 1598, 1580, 1449, 1409, 1380, 1336, 1258, 1203, 1155;  $\delta_{\text{H}}$  (300 MHz,  $\text{CDCl}_3$ ) 1.41 (3 H, d,  $J$  6.0,  $\text{CH}_2\text{CHMe}$ ), 1.66 (3 H, d,  $J$  6.3, Me), 2.58 (1 H, dd,  $J$  11.0 and 15.9,  $\text{CH}_{\text{ax}}\text{H}$ ), 3.04 (1 H, dd,  $J$  2.0 and 15.9,  $\text{CHH}_{\text{eq}}$ ), 3.69 (1 H, m, H-3), 3.75 (3 H, s, OMe), 3.87 (3 H, s, OMe), 3.93 (3 H, s, OMe), 3.97 (3 H, s, OMe), 5.22 (1 H, q,  $J$  6.3, H-1), 6.51 (1 H, d,  $J$  2.3, Ar-H), 6.97 (1

H, d,  $J$  2.3, Ar-H);  $\delta_{\text{C}}$  (75 MHz,  $\text{CDCl}_3$ ) 21.8 (Me), 23.2 (Me), 32.0 ( $\text{CH}_2$ ), 55.3 (CH), 56.1 (CH), 60.6 (OMe), 61.5 (OMe), 69.4 (OMe), 71.2 (OMe), 92.4 (CH), 98.7 (CH), 115.3 (C), 126.5 (C), 127.7 (C), 130.4 (C), 147.8 (C), 149.3 (C), 157.4 (C), 158.1 (C);  $m/z$  (EI+) 332 (64%,  $\text{M}^+$ ), 317 (100), 287 (20), 273 (27); HRMS (EI+,  $\text{M}^+$ ) found 332.1622, calc. for  $\text{C}_{19}\text{H}_{24}\text{O}_5$  332.1624.

### Ventiloquinone L methyl ether **8**

To a solution of naphthopyran **7** (110 mg, 0.331 mmol) in acetonitrile (5 mL) and water (2 mL) was added phenyliodine bis(trifluoroacetate) (PIFA, 213 mg, 0.496 mmol) portionwise over 5 min. The resulting solution was stirred for 2 h and the whole partitioned between diethyl ether (30 mL) and water (30 mL). The aqueous layer was removed and extracted with diethyl ether (x 2) and the combined organic extracts washed with water, brine, dried ( $\text{MgSO}_4$ ), filtered and concentrated *in vacuo*. Purification by flash chromatography eluting with hexanes-ethyl acetate (3:1) gave the *title compound* **8** (81 mg, 0.27 mmol, 81%) as a bright yellow solid, m.p. 147–149 °C (Lit<sup>3</sup> 153–154 °C);  $[\alpha]_{\text{D}}^{20}$  +344.4 ( $c$  0.5,  $\text{CH}_2\text{Cl}_2$ ) [Lit<sup>3</sup>  $[\alpha]_{\text{D}}^{24}$  +265 ( $c$  0.16,  $\text{CH}_2\text{Cl}_2$ )];  $\nu_{\text{max}}$  (neat)/ $\text{cm}^{-1}$  2973, 2937, 1649, 1594, 1566, 1456, 1346, 1320, 1271, 1199, 1158, 827;  $\delta_{\text{H}}$  (300 MHz,  $\text{CDCl}_3$ ) 1.35 (3 H, d,  $J$  8.0,  $\text{CH}_2\text{CHMe}$ ), 1.53 (3 H, d,  $J$  8.0, Me), 2.13–2.24 (1 H, ddd,  $J$  18.0, 10.2 and 3.6,  $H_{\text{ax}}\text{H}$ ), 2.75 (1 H, dt,  $J$  2.4 and 18.0,  $\text{HH}_{\text{eq}}$ ), 3.59–3.60 (1 H, m, H-3), 3.94 (3 H, s, OMe), 3.96 (3 H, s, OMe), 4.81–4.86 (1 H, m, H-1), 6.70 (1 H, d,  $J$  3.2, Ar-H), 7.23 (1 H, d,  $J$  3.2, Ar-H);  $\delta_{\text{C}}$  (75 MHz,  $\text{CDCl}_3$ ) 21.0 (Me), 21.2 (Me), 30.0 ( $\text{CH}_2$ ), 55.9 (OMe), 56.4 (OMe), 68.7 (CH), 70.3 (CH), 102.9 (CH), 104.2 (CH), 114.8 (C), 135.7 (C), 139.4 (C), 148.8 (C), 161.6 (C), 164.4 (C), 182.5 (C=O), 184.1 (C=O);  $m/z$  (EI+) 302 (100%,  $[\text{M}]^+$ ), 287 (76), 273 (77), 269 (20), 259 (22), 244 (14), 229 (10), 165 (10), 128 (12), 115 (13), 106 (14), 43 (36); HRMS (EI+,  $\text{M}^+$ ) found 302.1157, calc. for  $\text{C}_{17}\text{H}_{18}\text{O}_5$  302.1154. Data consistent with literature<sup>3</sup>

### Ventiloquinone L **2**

A solution of ventiloquinone L methyl ether **8** (50 mg, 0.17 mmol) in dichloromethane (10 mL) was cooled to -78 °C. Boron trichloride (0.33 mmol, 0.33 mL of a 1M solution in dichloromethane) was added dropwise over 5 min. The resulting dark red solution was stirred at -78 °C for 15 min then warmed to r.t and stirred for 1 h. The reaction mixture was poured into water (30 mL) and extracted with dichloromethane (3 x 15 mL). The combined organic extracts washed with water, brine, dried ( $\text{MgSO}_4$ ), filtered and concentrated *in*

*vacuo*. Flash chromatography eluting with hexanes-ethyl acetate (5:1) gave the *title compound* (41 mg, 0.14 mmol, 84 %) as a bright yellow solid m.p. 120–122 °C (Lit<sup>4</sup> 126 °C);  $[\alpha]_D^{20}$  +435.2 (*c* 0.01, CHCl<sub>3</sub>) (Lit isolation<sup>4</sup>  $[\alpha]_D^{30}$  +387.1 (*c* 0.01, CHCl<sub>3</sub>));  $\nu_{\max}$  (neat)/cm<sup>-1</sup> 2973, 2938, 2848, 1664, 1631, 1596, 1487, 1445, 1386, 1367, 1297, 1273, 1208, 1152, 1128, 1100, 990, 829, 779;  $\delta_H$  (400 MHz, CDCl<sub>3</sub>) 1.35 (3 H, d, *J* 6.4, CH<sub>2</sub>CHMe), 1.57 (3 H, d, *J* 6.4, Me), 2.17-2.25 (1 H, ddd, *J* 4.0, 10.8 and 18.4, *H<sub>ax</sub>*H), 2.69-2.75 (1 H, dt, *J* 2.8 and 18.4, *HH<sub>eq</sub>*), 3.54-3.58 (1 H, ddq, *J* 2.8, 6.0 and 9.6, H-3), 3.88 (3 H, s, OMe), 4.81 (1 H, ddq, *J* 2.8, 3.9 and 6.0, H-1), 6.58 (1 H, d, *J* 2.4, Ar-H), 7.12 (1 H, d, *J* 2.4, Ar-H), 12.22 (1 H, s, OH);  $\delta_C$  (100 MHz, CDCl<sub>3</sub>) 21.2 (2 x Me), 30.6 (CH<sub>2</sub>), 56.0 (OMe), 68.6 (CH), 69.8 (CH), 106.11 (CH), 107.6 (CH), 109.5 (C), 133.2 (C), 143.2 (C), 146.7 (C), 164.2 (C), 165.7 (C), 183.0 (C=O), 187.4 (C=O); *m/z* (EI+) 288 (100%, [M]<sup>+</sup>), 273 (42), 259 (30), 244 (28), 151 (11), 43 (16); HRMS (EI+, M<sup>+</sup>) found 288.1001, calc. for C<sub>16</sub>H<sub>16</sub>O<sub>5</sub> 288.0998. Data consistent with literature<sup>4,5</sup>

**(1*R*,1'*R*,3*S*,3'*S*,6*R*)-7,7',9,9'-tetramethoxy-1,1',3,3'-tetramethyl-3,3',4,4'-tetrahydro-1*H*,1'*H*-6,6'-bibenzo[*g*]isochromene-5,5',10,10'-tetraone (10a) and (1*R*,1'*R*,3*S*,3'*S*,6*S*)-7,7',9,9'-tetramethoxy-1,1',3,3'-tetramethyl-3,3',4,4'-tetrahydro-1*H*,1'*H*-6,6'-bibenzo[*g*]isochromene-5,5',10,10'-tetraone (10b)**

Naphthopyran **7** (48 mg, 0.14 mmol) was taken up in acetonitrile (4 mL) and a solution of cerium(IV) ammonium nitrate (245 mg, 0.45 mmol) in distilled water (2 mL) was added. The reaction mixture stirred for 30 min at r.t. and water (12 mL) was then added. The aqueous layer was extracted with ethyl acetate (3 x 30 mL) and the combined organic layers dried over anhydrous magnesium sulfate, filtered and concentrated *in vacuo*. The resulting residue was purified by flash chromatography eluting with hexanes-ethyl acetate (1:3 then 100% ethyl acetate) to give the *title compound* as an orange solid and a 1:1 mixture of atropisomers; (30.7 mg, 0.051 mmol, 71%). Purification of this mixture by further flash chromatography eluting with hexanes-ethyl acetate (1:1 then 2:3) gave pure (*R*)-atropisomer **10a** (*R<sub>f</sub>* 0.42, ethyl acetate) as a yellow solid (14.1 mg, 0.023 mmol, 34%) and pure (*S*)-atropisomer **10b** (*R<sub>f</sub>* 0.35, ethyl acetate) as a yellow solid (15.1 mg, 0.025 mmol, 36%).

**10a** m.p. 270–272 °C;  $[\alpha]_D^{24} +852.9$  (*c* 0.13, CH<sub>2</sub>Cl<sub>2</sub>);  $\nu_{\max}$  (neat)/cm<sup>-1</sup> 2928, 2851, 1737, 1649, 1634, 1582, 1551, 1456, 1433, 1341, 1300, 1253, 1211, 1149;  $\delta_H$  (300 MHz, CDCl<sub>3</sub>) 1.27 (6 H, d, *J* 6.3, 2 x CH<sub>2</sub>CHMe), 1.56 (6 H, d, *J* 6.6, 2 x Me), 1.97 (2 H, ddd, *J* 3.8, 10.2 and 18.2, 2 x CH<sub>ax</sub>H), 2.50 (2 H, dt, *J* 2.6 and 18.2, 2 x CHH<sub>eq</sub>), 3.48 (2 H, m, 2 x H-3), 3.74 (6 H, s, 2 x OMe), 4.05 (6 H, s, 2 x OMe), 4.81 (2 H, m, 2 x H-1), 6.757 (2 H, s, 2 x Ar-H);  $\delta_C$  (75 MHz, CDCl<sub>3</sub>) 20.7 (2 x Me), 21.2 (2 x Me), 29.9 (2 x CH<sub>2</sub>), 56.1 (2 x OMe), 56.3 (2 x OMe), 68.8 (2 x CH), 70.3 (2 x CH), 99.6 (2 x CH), 114.8 (2 x C), 120.9 (2 x C), 132.3 (2 x C), 139.8 (2 x C), 148.0 (2 x C), 161.3 (2 x C), 161.6 (2 x C), 182.7 (2 x C=O), 184.8 (2 x C=O); *m/z* (EI+) 602 (100%, M<sup>+</sup>), 587 (10), 260 (10), 43 (80); HRMS (EI+, M<sup>+</sup>) found 602.2150, calc for C<sub>34</sub>H<sub>34</sub>O<sub>10</sub> 602.2152.

**10b** m.p. 127–129 °C;  $[\alpha]_D^{24} +108.1$  (*c* 0.16, CH<sub>2</sub>Cl<sub>2</sub>);  $\nu_{\max}$  (neat)/cm<sup>-1</sup> 2928, 2851, 1737, 1649, 1634, 1582, 1551, 1456, 1433, 1341, 1300, 1253, 1211, 1149;  $\delta_H$  (300 MHz, CDCl<sub>3</sub>) 1.26 (6 H, d, *J* 6.0, 2 x CH<sub>2</sub>CHMe), 1.53 (6 H, d, *J* 6.6, 2 x Me), 1.94 (2 H, ddd, *J* 3.8, 10.3 and 18.1, 2 x CH<sub>ax</sub>H), 2.50 (2 H, t, *J* 2.6 and 18.1, 2 x CHH<sub>eq</sub>), 3.49 (2 H, m, 2 x H-3), 3.73 (6 H, s, 2 x OMe), 4.05 (6 H, s, 2 x OMe), 4.82 (2 H, m, 2 x H-1), 6.76 (2 H, s, 2 x Ar-H);  $\delta_C$  (75 MHz, CDCl<sub>3</sub>) 20.6 (2 x Me), 21.2 (2 x Me), 29.8 (2 x CH<sub>2</sub>), 56.1 (2 x OMe), 56.3 (2 x OMe), 68.8 (2 x CH), 70.3 (2 x CH), 99.4 (2 x CH), 114.9 (2 x C), 121.4 (2 x C), 131.3 (2 x C), 139.6 (2 x C), 148.2 (2 x C), 161.3 (2 x C), 162.6 (2 x C), 183.1 (2 x C=O), 184.8 (2 x C=O); *m/z* (EI+) 602 (100%, M<sup>+</sup>), 587 (10), 260 (10), 43 (80); HRMS (EI+, M<sup>+</sup>) found 602.2150, calc for C<sub>34</sub>H<sub>34</sub>O<sub>10</sub> 602.2152.

**(1*R*,1'*R*,3*S*,3'*S*,6*R*)-9,9'-dihydroxy-7,7'-dimethoxy-1,1',3,3'-tetramethyl-3,3',4,4'-tetrahydro-1*H*,1'*H*-6,6'-bibenzo[*g*]isochromene-5,5',10,10'-tetraone (12a) and (1*R*,1'*R*,3*S*,3'*S*,6*S*)-9,9'-dihydroxy-7,7'-dimethoxy-1,1',3,3'-tetramethyl-3,3',4,4'-tetrahydro-1*H*,1'*H*-6,6'-bibenzo[*g*]isochromene-5,5',10,10'-tetraone (12b)**

A solution of **10a** and **10b** (1:1, 11 mg, 0.0183 mmol) in dichloromethane (5 mL) was cooled to -78 °C. Boron trichloride (0.11 mmol, 0.11 mL of a 1 M solution in dichloromethane) was added dropwise and the reaction mixture was warmed to 0 °C. After 3 h a solution of 1 M HCl was added (20 mL) and the mixture extracted with dichloromethane (x 3). The combined organic extracts were dried (MgSO<sub>4</sub>), filtered and concentrated in vacuo. Purification by preparative TLC (ethyl acetate-hexanes, 1:4) gave

the *title compounds* **12a** and **12b** (7 mg, 0.012 mmol, 68%) as an orange solid and an inseparable 1:1 mixture of atropisomers, m.p. >270 °C ;  $[\alpha]_D^{24} + 22.4$  (c 0.53, CH<sub>2</sub>Cl<sub>2</sub>);  $\nu_{\max}$  (neat)/cm<sup>-1</sup> 2920, 2852, 1638, 1388, 1284, 1207, 904;  $\delta_H$  (400 MHz, CDCl<sub>3</sub>) 1.25-1.43 (24 H, m, 4 x CH<sub>2</sub>CHMe + 4 x Me), 1.99 (4 H, m, 4 x CH<sub>ax</sub>H), 2.44 (2 H, dt, *J* 2.6 and 18.6, 2 x CHH<sub>eq</sub> atropisomer a), 2.52 (2 H, dt, *J* 2.7 and 18.7, 2 x CHH<sub>eq</sub> atropisomer b), 3.50 (4 H, m, 4 x H-3), 3.71 and 3.72 (4 H, 2 x s, 4 x Me), 4.80 (4 H, m, 4 x H-1), 6.69 and 6.70 (4 H, 4 x s, 4 x Ar-H), 13.09 (4 H, br s, 4 x OH);  $\delta_C$  (100 MHz, CDCl<sub>3</sub>) 21.06 and 21.11 (2 x Me and 2 x Me'), 22.6 (2 x Me), 28.88 and 28.91 (2 x CH<sub>2</sub> and 2 x CH<sub>2</sub>'), 56.4 (2 x OMe and 2 x OMe'), 69.7 (2 x CH and 2 x CH'), 70.2 (2 x CH and 2 x CH'), 103.83 and 103.87 (2 x CH and 2 x CH'), 116.72 and 116.75 (2 x C and 2 x C'), 118.1 (2 x C and 2 x C'), 129.8 (2 x C and 2 x C'), 130.9 (2 x C and 2 x C'), 162.2 (2 x C and 2 x C'), 168.9 (2 x C and 2 x C'), 182.1 (2 x C=O), 186.6 and 186.7 (2 x C=O and 2 x C'=O) 1 x C not observed; *m/z* (EI+) 575 (12%, MH<sup>+</sup>), 360 (15), 267 (12), 202 (31), 172 (41); HRMS (EI+, MH<sup>+</sup>) found 575.1908, calc for C<sub>32</sub>H<sub>30</sub>O<sub>10</sub> + H 575.1912.

## References

1. M. A. Brimble, C. L. Flowers, J. K. Hutchinson, J. E. Robinson and M. Sidford. *Tetrahedron*, 2005, **61**, 10036.
2. J. S. Gibson, O. Andrey and M. A. Brimble. *Synthesis*, 2007, 2611.
3. L. A. Mitscher, S. R. Gollapudi, D. S. Oburn and S. Drake. *Phytochemistry*, 1985, **24**, 1681
4. S. R. Jammula, S. B. Pepalla, H. Telikepalli, K. V. J. Rao and R. H. Thompson. *Phytochemistry*, 1991, **30**, 3741
5. L. M. Tewierik, C. Dimitriadis, C. D. Donner. M. Gill and B. Willems, *Org. Biomol. Chem.*, 2006, **4**, 3311

JS-48

Supplementary Material (ESI) for Organic & Biomolecular Chemistry  
This journal is (c) The Royal Society of Chemistry 2009

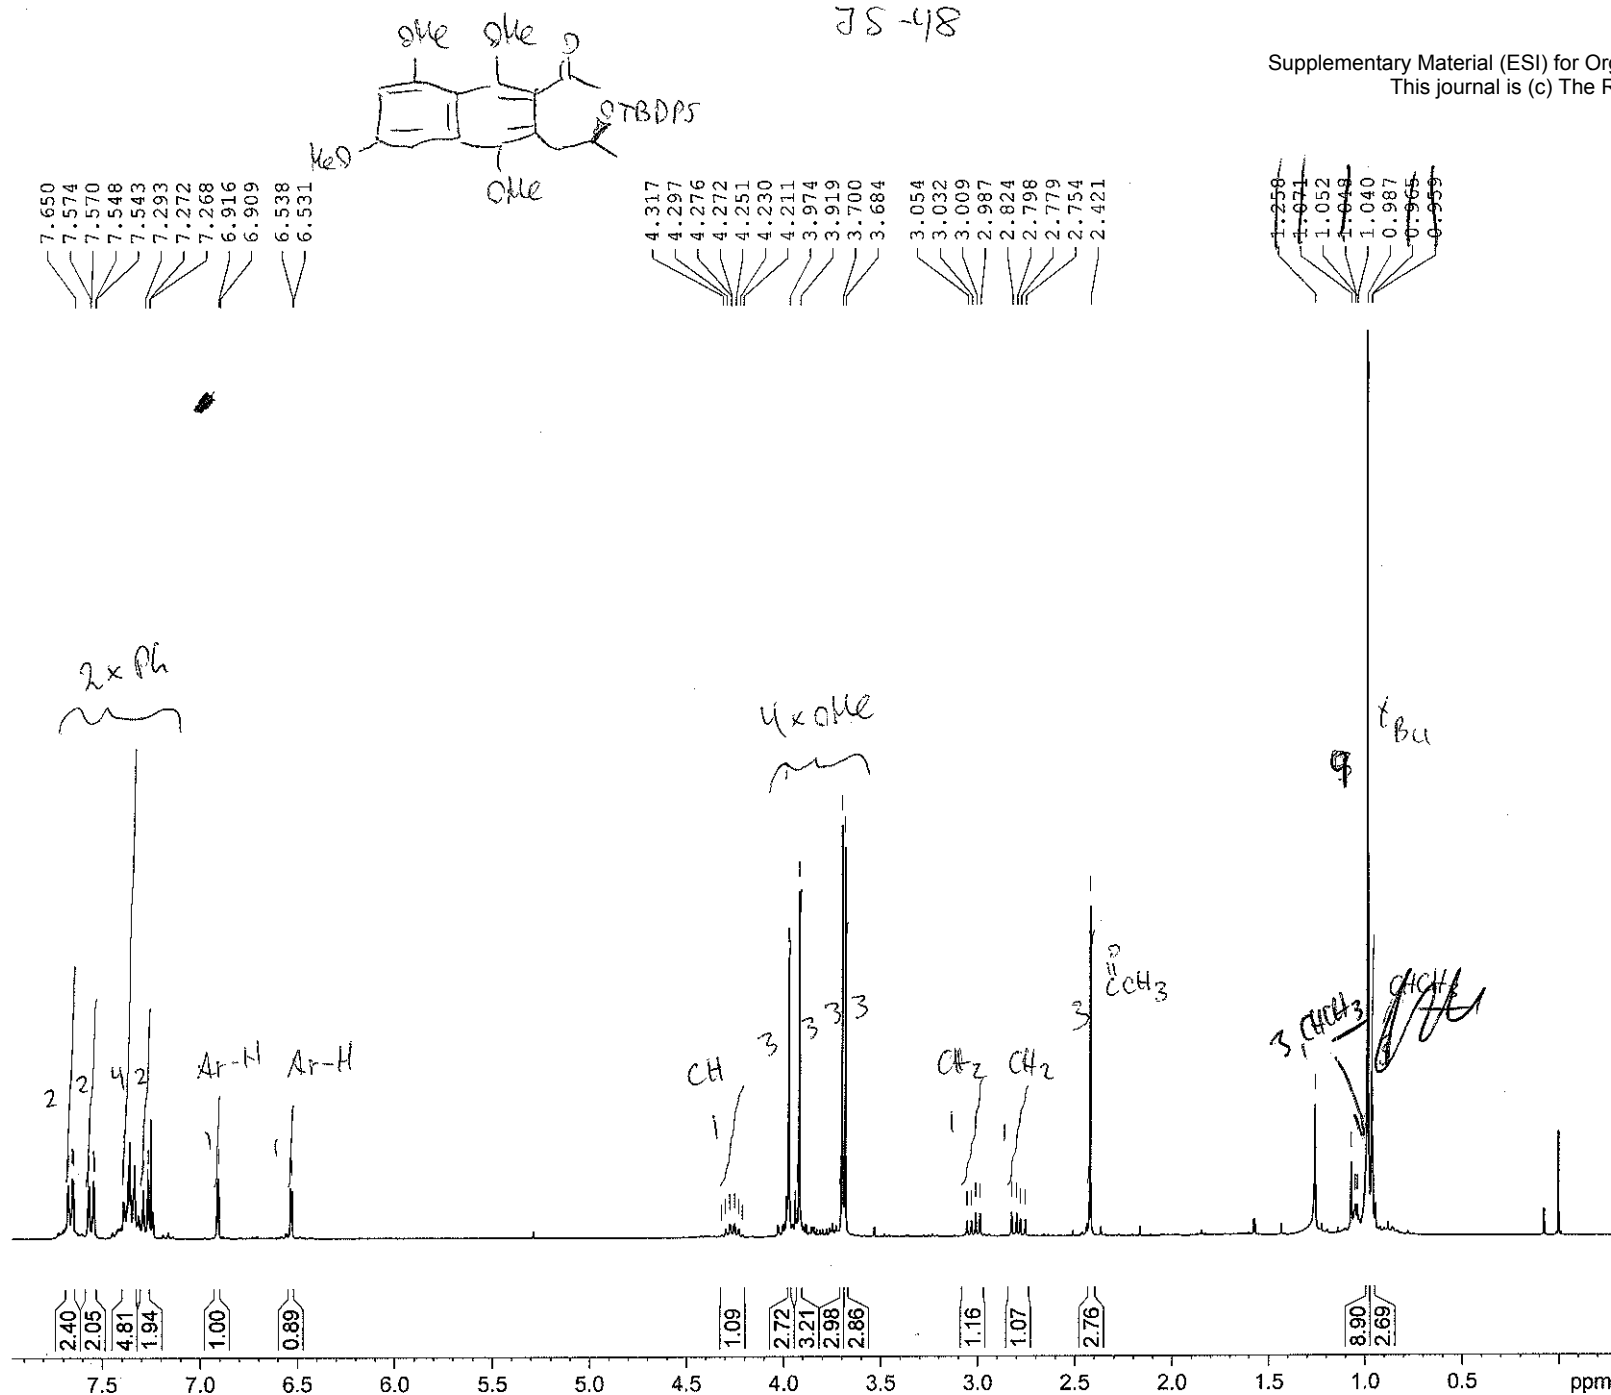

Current Data Parameters  
NAME jsej48\_f12-22\_r2  
EXPNO 1  
PROCNO 1

F2 - Acquisition Parameters  
Date\_ 20080207  
Time\_ 15.05  
INSTRUM spect  
PROBHD 5 mm QNP 1H/13  
PULPROG zg30  
TD 32768  
SOLVENT  
NS 64  
DS 0  
SWH 5995.204 Hz  
FIDRES 0.182959 Hz  
AQ 2.7329011 sec  
RG 228.1  
DW 83.400 usec  
DE 6.00 usec  
TE 300.2 K  
D1 0.10000000 sec  
TD0 1

===== CHANNEL f1 =====  
NUC1 1H  
P1 11.90 usec  
PL1 1.90 dB  
SFO1 300.1315006 MHz

F2 - Processing parameters  
SI 16384  
SF 300.1300071 MHz  
WDW EM  
SSE 0  
LB 0.10 Hz  
GB 0  
PC 0.80



JS-48

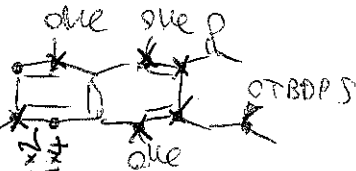

Current Data Parameters  
NAME jsej48\_f12-22 r2  
EXPNO 2  
PROCNO 1

F2 - Acquisition Parameters  
Date\_ 20080207  
Time\_ 15.21  
INSTRUM spect  
PROBHD 5 mm QNP 1H/13  
PULPROG zgpg  
TD 65536  
SOLVENT  
NS 808  
DS 0  
SWH 17985.611 Hz  
FIDRES 0.274439 Hz  
AQ 1.8219508 sec  
RG 16384  
DW 27.800 usec  
DE 20.00 usec  
TE 300.2 K  
D1 0.17593171 sec  
d11 0.03000000 sec  
DELTA 0.07593171 sec  
TD0 1

===== CHANNEL f1 =====  
NUC1 13C  
P1 5.44 usec  
PL1 4.00 dB  
SFO1 75.4760973 MHz

===== CHANNEL f2 =====  
CPDPRG2 waltz16  
NUC2 1H  
PCPD2 100.00 usec  
PL2 1.90 dB  
PL12 20.80 dB  
PL13 26.40 dB  
SFO2 300.1312005 MHz

F2 - Processing parameters  
SI 32768  
SF 75.4677498 MHz  
WDW EM  
SSB 0  
LB 1.00 Hz  
GB 0  
PC 1.00

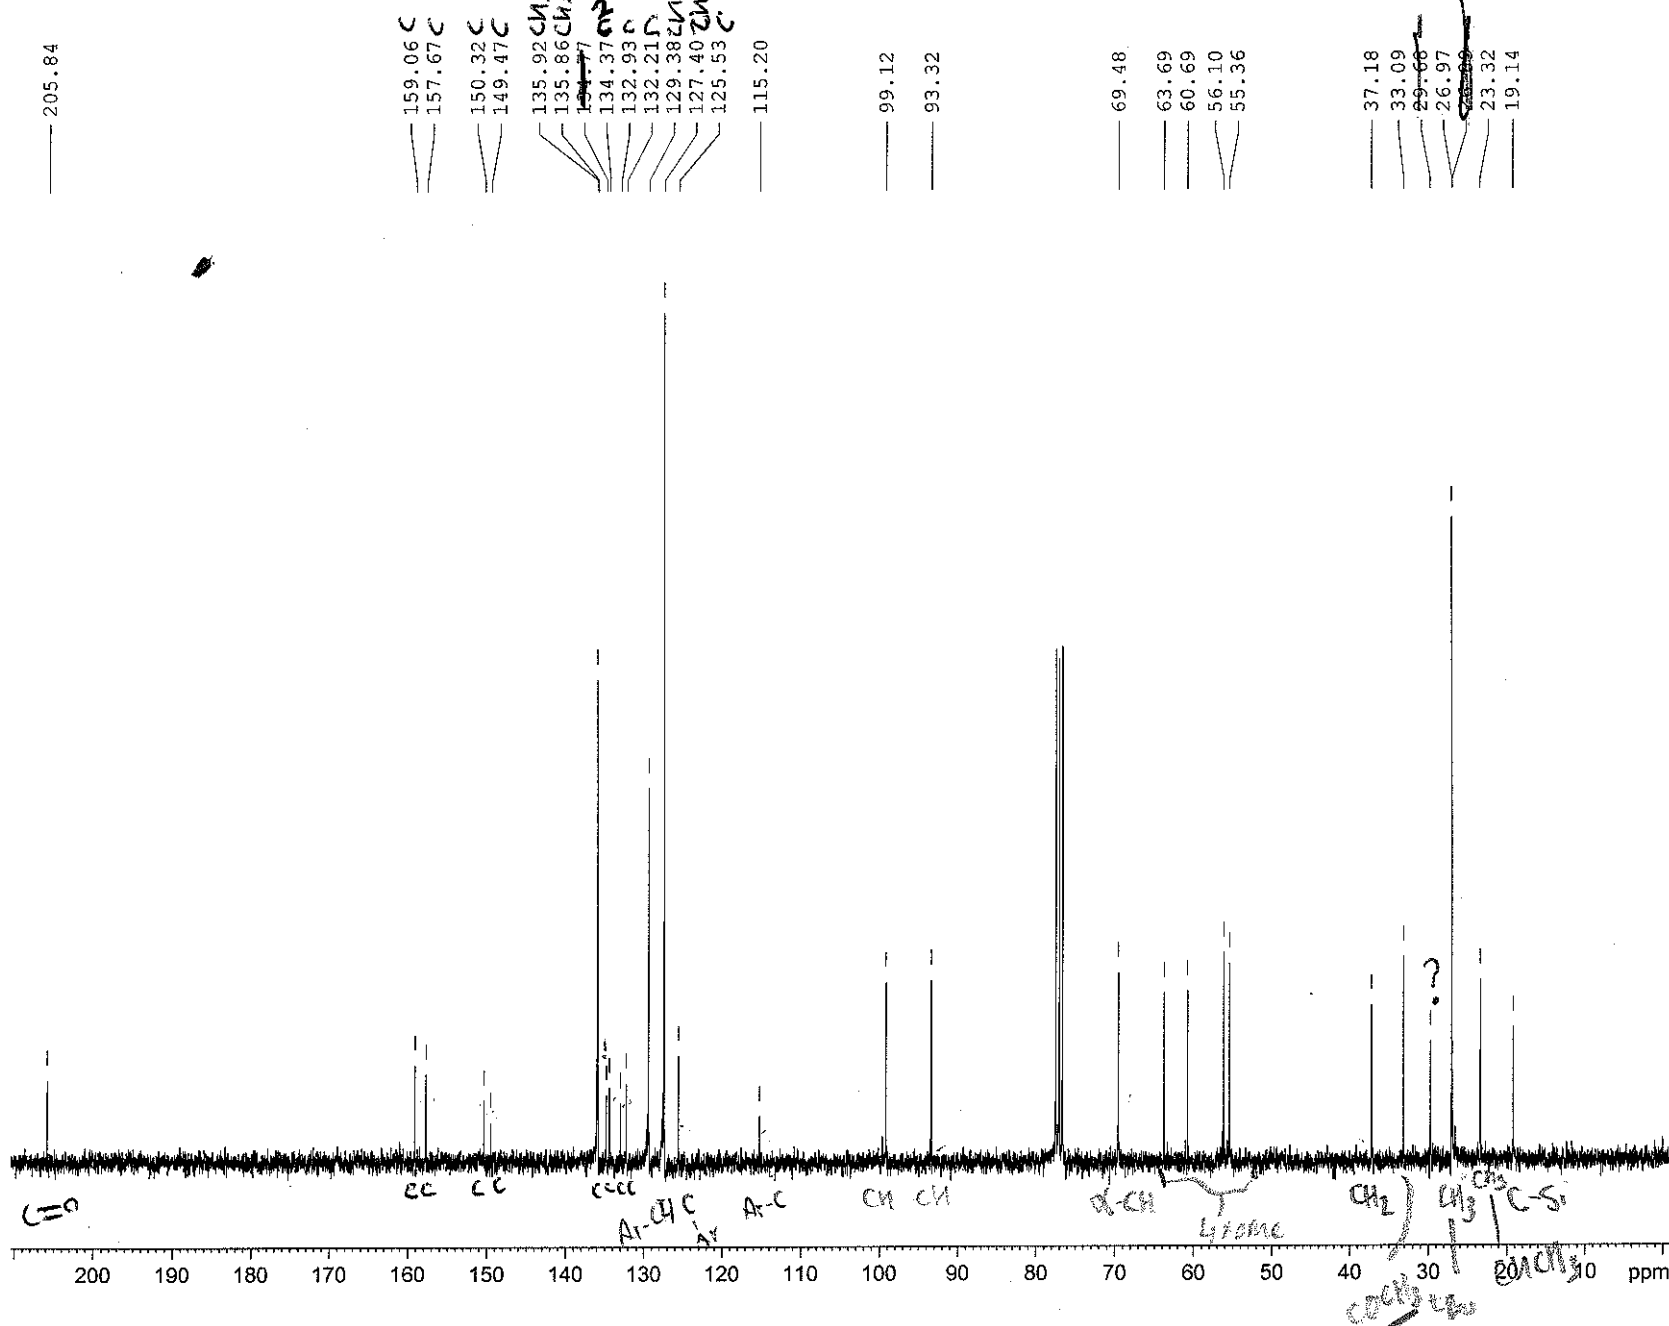

JS-52

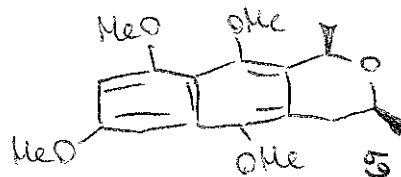

Supplementary Material (ESI) for Organic & Biomolecular Chemistry  
This journal is (c) The Royal Society of Chemistry 2009

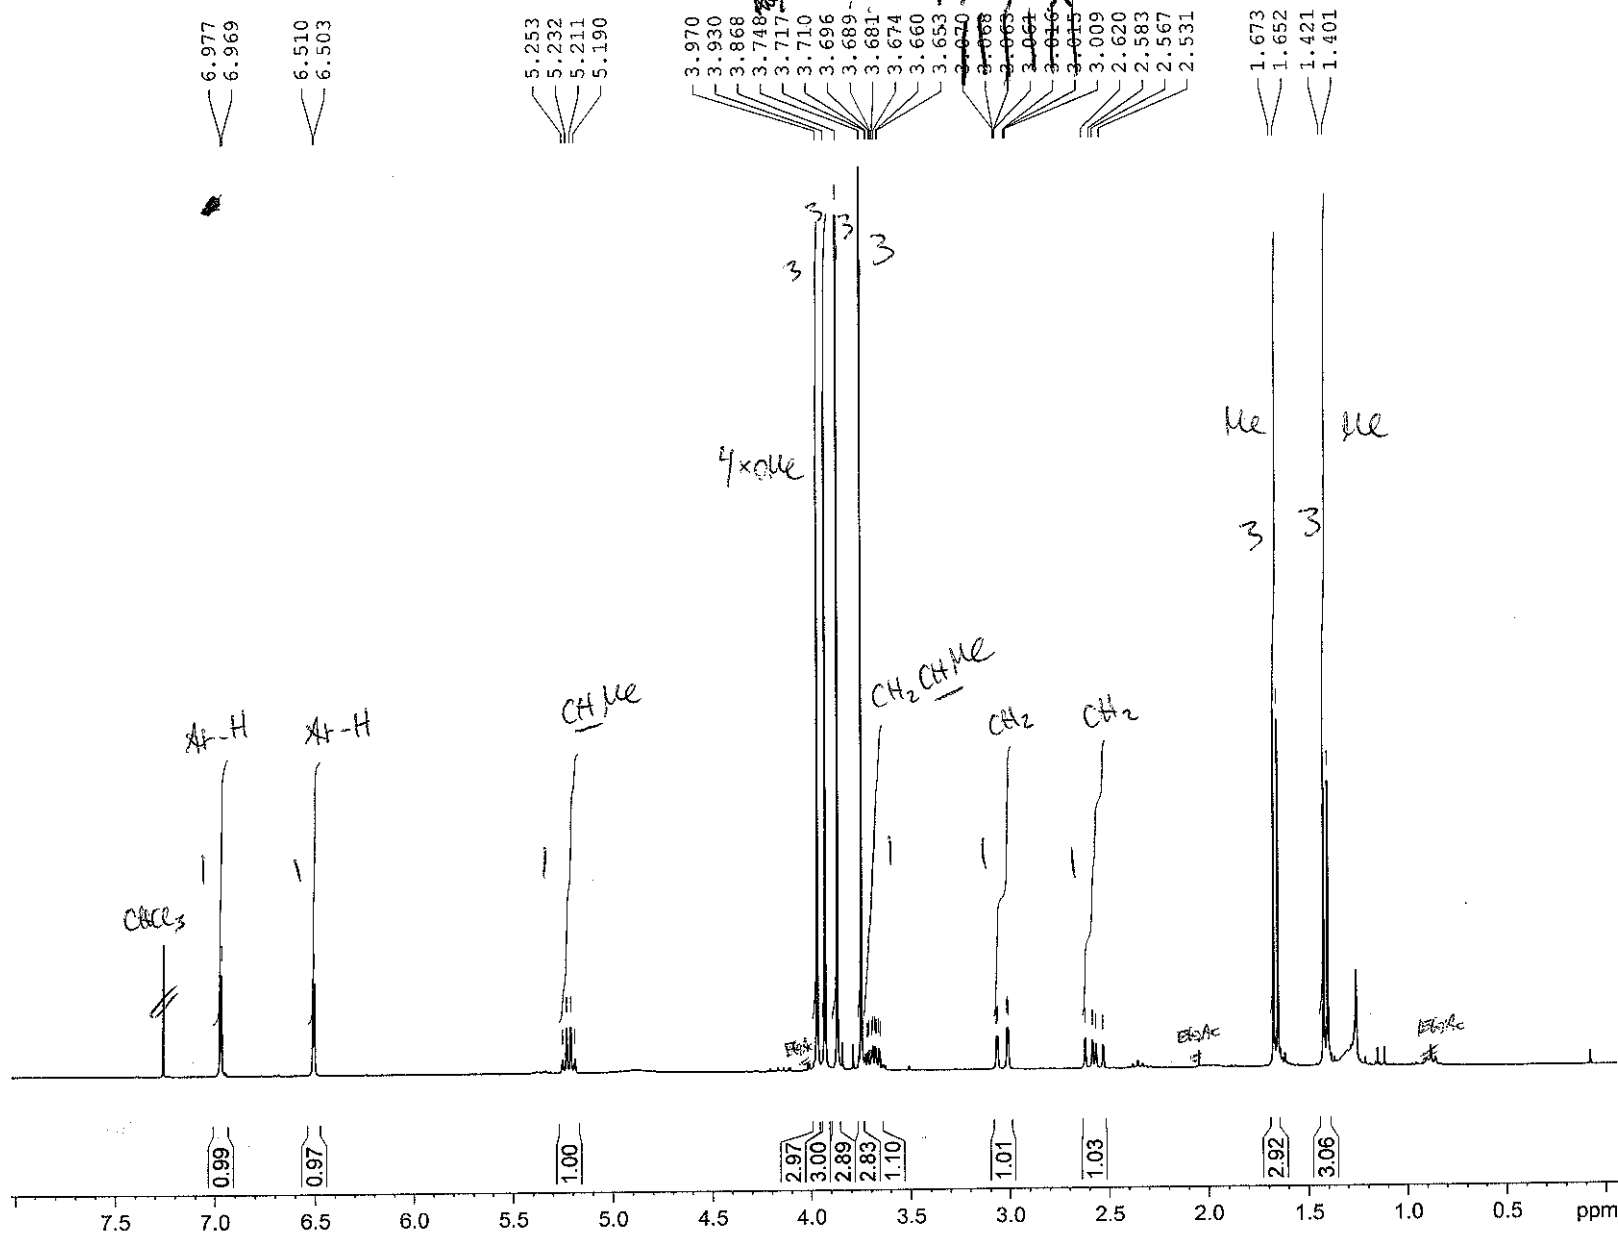

Current Data Parameters  
NAME jsej52  
EXPNO 1  
PROCNO 1

F2 - Acquisition Parameters  
Date\_ 20080213  
Time 16.10  
INSTRUM spect  
PROBHD 5 mm QNP 1H/13  
PULPROG zg30  
TD 32768  
SOLVENT  
NS 64  
DS 0  
SWH 5995.204 Hz  
FIDRES 0.182959 Hz  
AQ 2.7329011 sec  
RG 256  
DW 83.400 usec  
DE 6.00 usec  
TE 300.2 K  
D1 0.10000000 sec  
TD0 1

===== CHANNEL f1 =====  
NUC1 1H  
P1 11.90 usec  
PL1 1.90 dB  
SFO1 300.1315006 MHz

F2 - Processing parameters  
SI 16384  
SF 300.1300057 MHz  
WDW EM  
SSB 0  
LB 0.10 Hz  
GB 0  
PC 0.80

JS-52

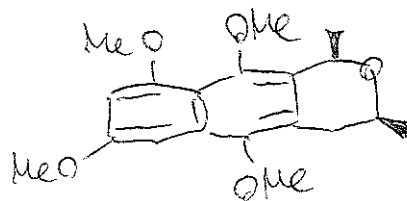

Supplementary Material (ESI) for Organic & Biomolecular Chemistry  
This journal is (c) The Royal Society of Chemistry 2009

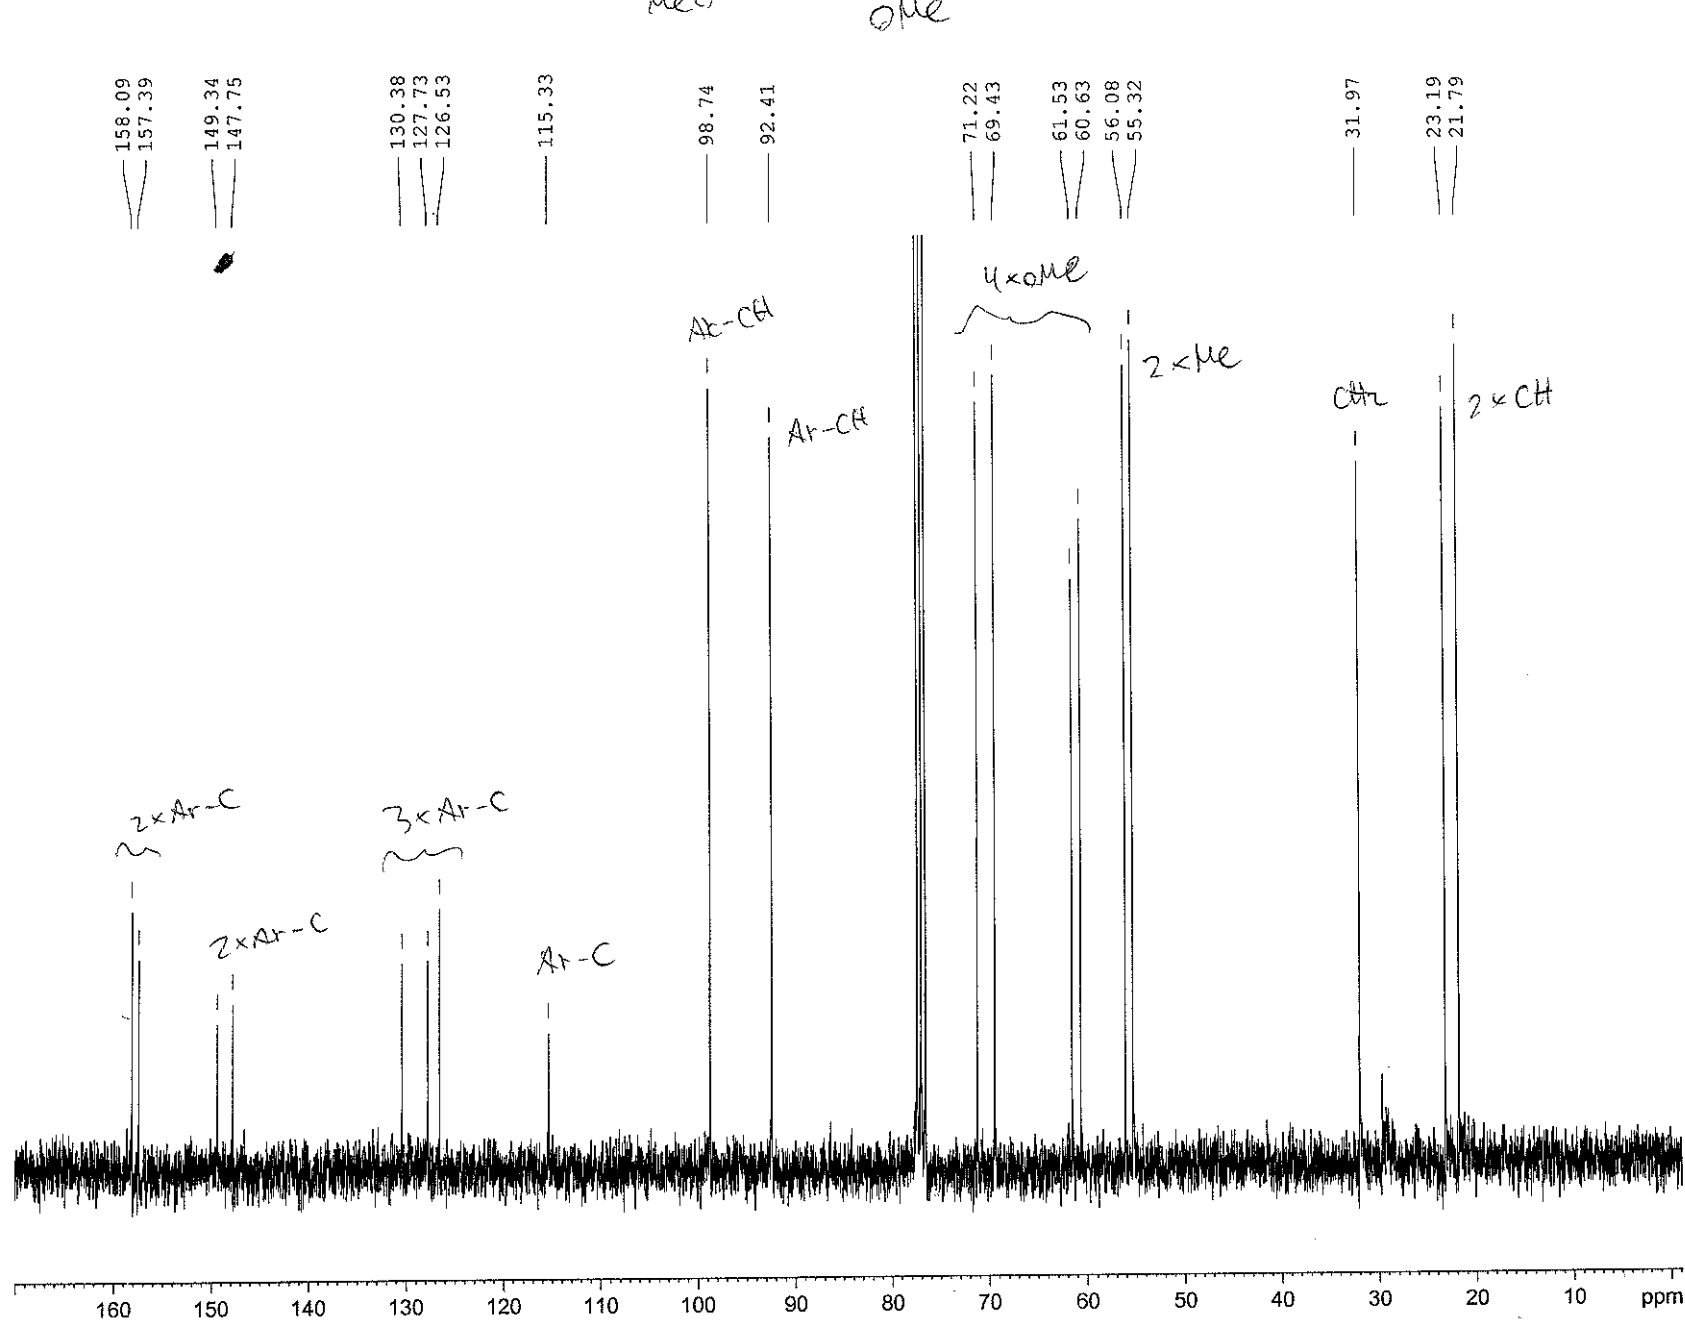

Current Data Parameters  
NAME jsej52  
EXPNO 2  
PROCNO 1

F2 - Acquisition Parameters  
Date\_ 20080213  
Time\_ 16.25  
INSTRUM spect  
PROBHD 5 mm QNP 1H/13  
PULPROG zgpg  
TD 65536  
SOLVENT  
NS 434  
DS 0  
SWH 17985.611 Hz  
FIDRES 0.274439 Hz  
AQ 1.8219508 sec  
RG 16384  
DW 27.800 usec  
DE 20.00 usec  
TE 300.2 K  
D1 0.17593171 sec  
d11 0.03000000 sec  
DELTA 0.07593171 sec  
TD0 1

===== CHANNEL f1 =====  
NUC1 13C  
P1 5.44 usec  
PL1 4.00 dB  
SFO1 75.4760973 MHz

===== CHANNEL f2 =====  
CPDPRG2 waltz16  
NUC2 1H  
PCPD2 100.00 usec  
PL2 1.90 dB  
PL12 20.80 dB  
PL13 26.40 dB  
SFO2 300.1312005 MHz

F2 - Processing parameters  
SI 32768  
SF 75.4677500 MHz  
WDW EM  
SSB 0  
LB 1.00 Hz  
GB 0  
PC 1.00

7.272  
7.239  
7.231

$$\begin{array}{r} 6.712 \\ 6.704 \\ \hline 2.2 \end{array}$$

5.301  
4.860  
4.851  
4.848  
4.838  
4.829  
4.826  
4.816

3.954  
3.602  
3.594  
3.581  
3.573  
3.568  
3.560  
3.547  
3.539

|       |       |       |      |
|-------|-------|-------|------|
| 2.760 | 24.18 | 36.00 | 0.00 |
| 2.752 |       |       |      |
| 2.743 |       |       |      |
| 2.700 |       |       |      |
| 2.691 |       |       |      |
| 2.682 |       |       |      |
| 2.241 |       |       |      |
| 2.229 |       |       |      |
| 2.207 |       |       |      |
| 2.194 |       |       |      |
| 2.181 |       |       |      |
| 2.170 |       |       |      |
| 2.147 |       |       |      |
| 2.134 |       |       |      |

$$\begin{array}{r} 1.548 \\ 1.526 \\ \hline 1.365 \\ 1.345 \end{array}$$

```

Current Data Parameters
NAME                Cs033_f1
EXPNO                1
PROCNO              1

F2 - Acquisition Parameters
Date_               20080623
Time                17.08
INSTRUM             spect
PROBHD              5 mm QNP 1H/13
PULPROG             zgpg30
TD                  65536
SOLVENT              CDCl3
NS                   16
DS                   0
SWH                  5995.104 Hz
FIDRES              0.182959 Hz
AQ                   2.7325511 sec
RG                   322.5
DW                   33.480 usec
DE                   6.00 usec
TE                   300.2 K
D1                   6.10000000 sec
TD0                  1

```

```
===== CHANNEL 01 =====
NUC1              1H
P1                 12.80 usec
PL1                1.90 dB
SFO1              300.1315006 MHz
```

```

FC - Processing parameters
SI          16384
SF          300.13600027 MHz
WDW          EM
SSE          0
LB          0.10 Hz
GB          0
PC          0.80

```

7-methoxy clotharidin

$$m.p. = 147-148^{\circ}C$$

$[\alpha]_D^{20} +344.4$

 $(CO_2, CH_2Cl_2)$ 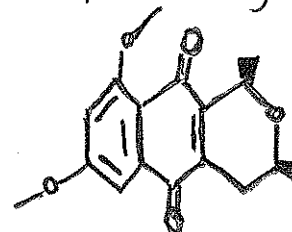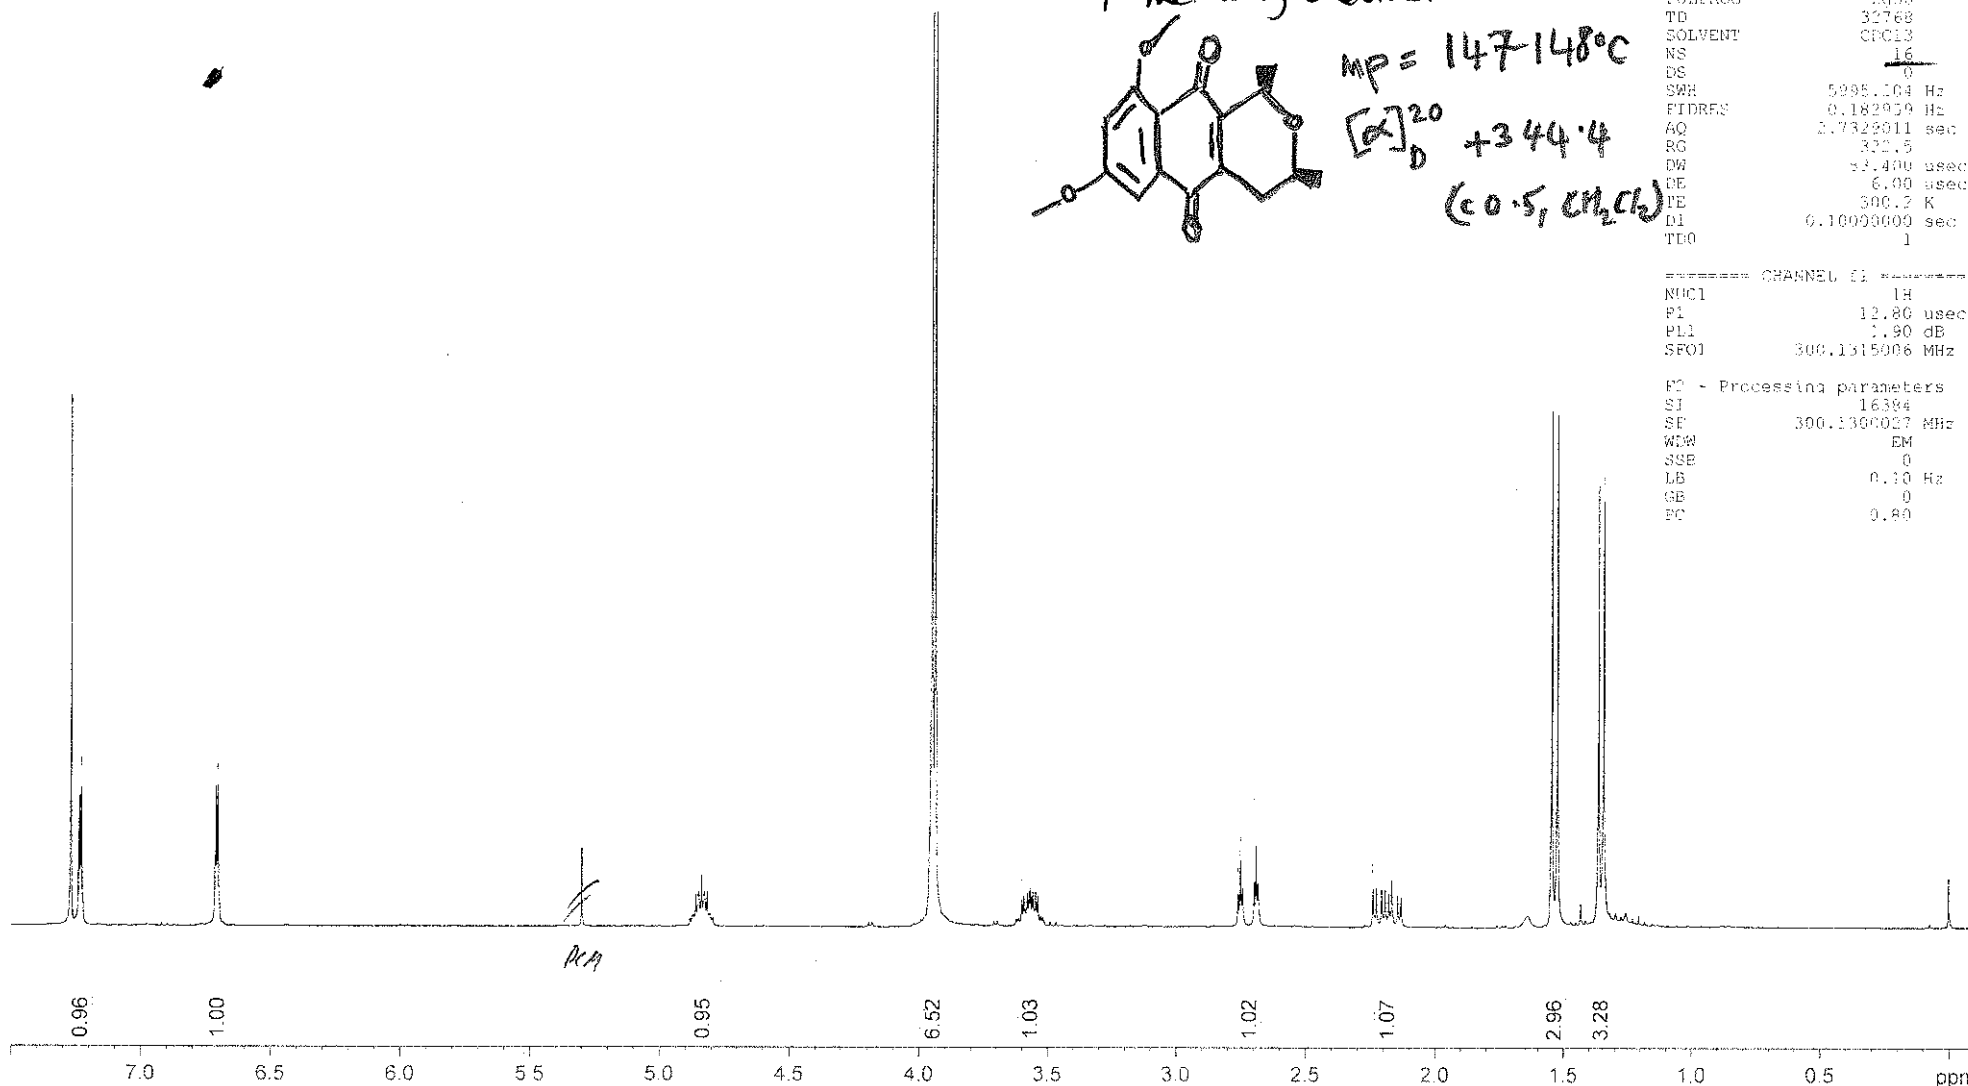

fs033\_f1

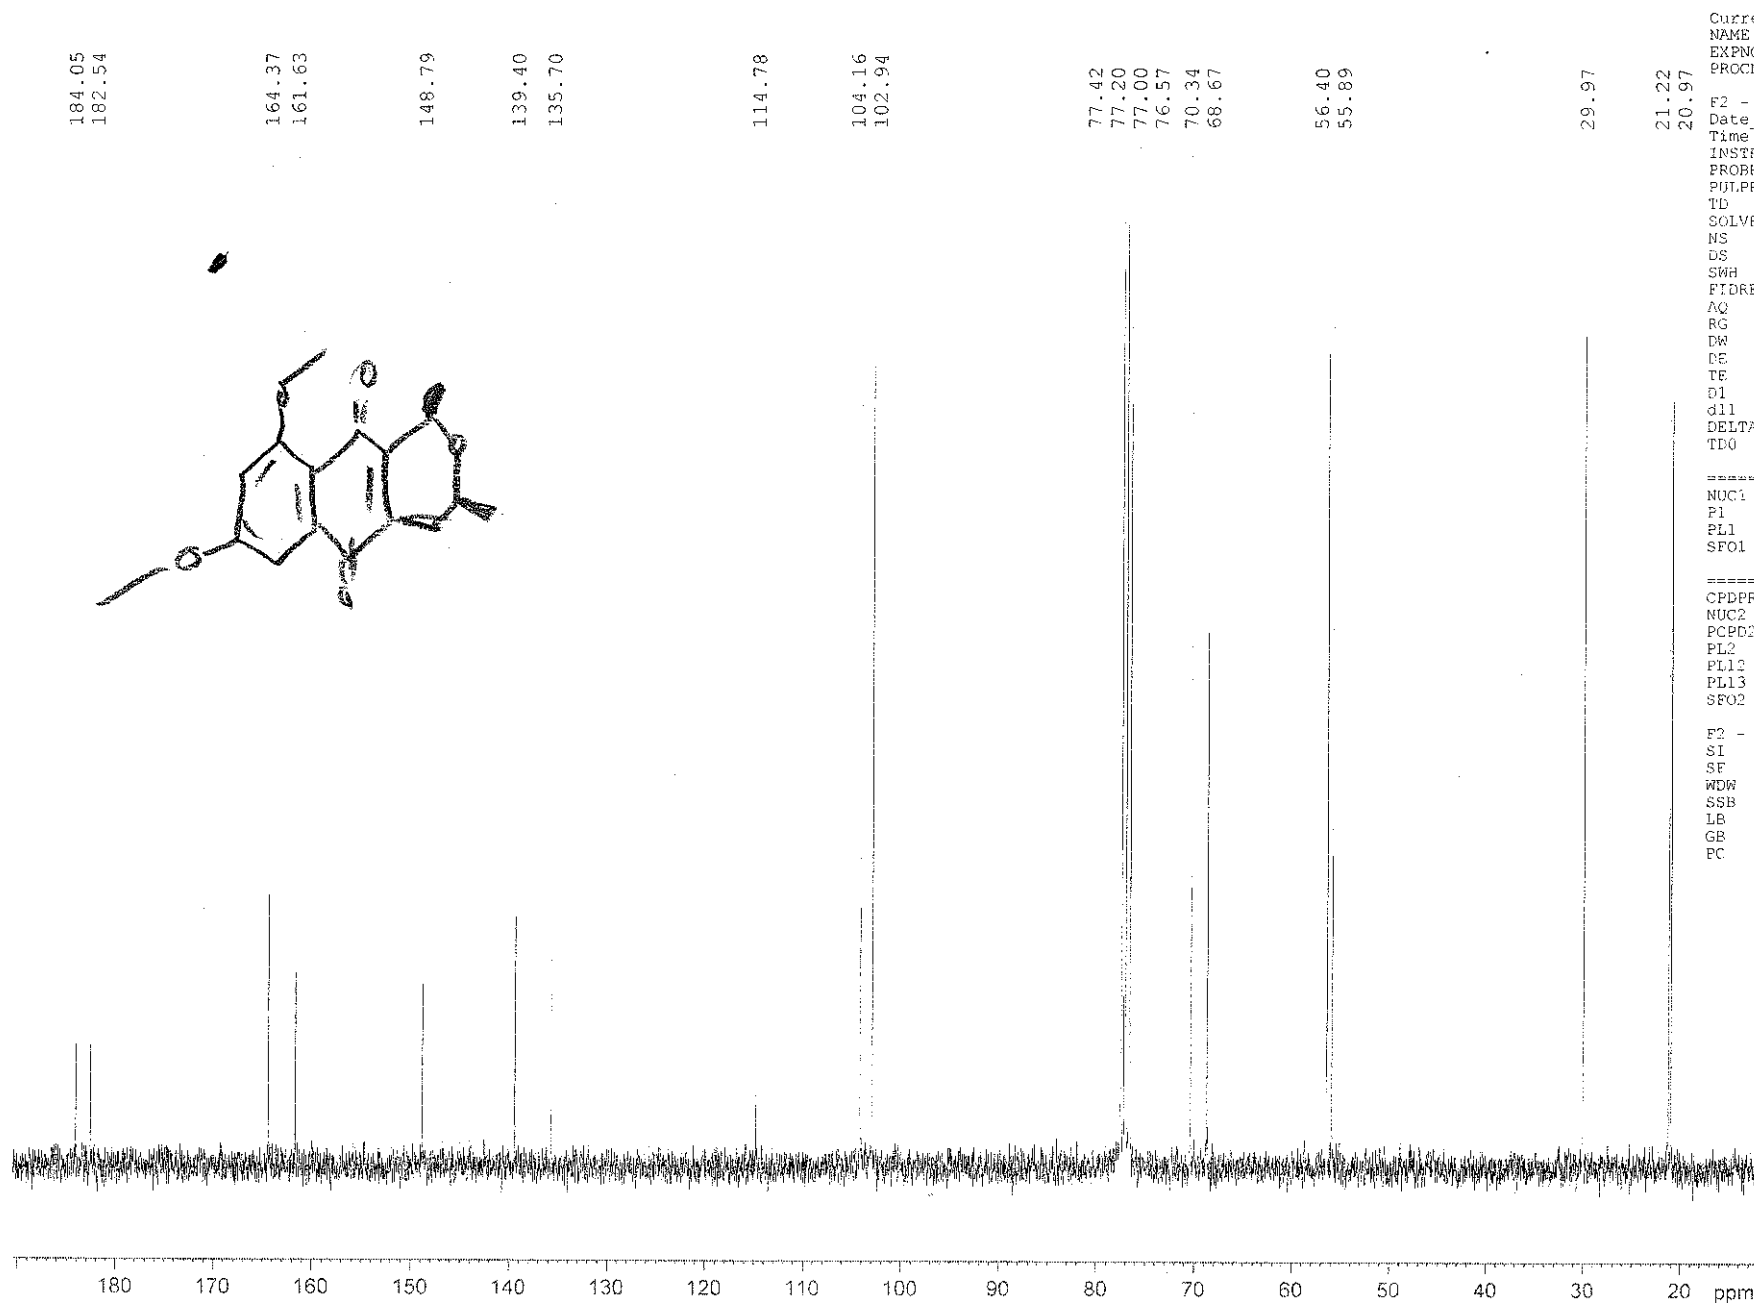

```

Current Data Parameters
NAME      fs033_f1
EXPNO     2
PROCNO    1

F2 - Acquisition Parameters
Date_     20080623
Time_     17.30
INSTRUM   spect
PROBHD    5 mm QNP 1H/13
PULPROG   zgpg
TD        65536
SOLVENT   CDCl3
NS         1000
DS         6
SWH        17985.611 Hz
FIDRES     0.274439 Hz
AQ         1.8219508 sec
RG         16384
DW         27.800 usec
DE         20.00 usec
TE         300.2 K
D1         0.17593171 sec
d11        0.03000000 sec
DELTA      0.07593171 sec
TD0        1

===== CHANNEL f1 =====
NUC1       13C
P1         5.44 usec
PL1        4.80 dB
SFO1       75.4760973 MHz

===== CHANNEL f2 =====
CPDPRG2    waltz16
NUC2       1H
PCPD2      100.00 usec
PL2        1.90 dB
PL12       19.76 dB
PL13       25.76 dB
SFO2       300.1312005 MHz

F2 - Processing parameters
SI         32768
SF         75.4677503 MHz
WDW        EM
SSB        0
LB         1.00 Hz
GB         0
PC         1.00
  
```

- 64

|       |       |
|-------|-------|
| 7.255 | 6.593 |
| 7.125 | 6.587 |
| 7.120 |       |

4.820 2.96.0, 2.8.6.0,  
4.820 3.9  
4.812  
4.802  
4.795  
3.884 -one  
3.588 2.8.6.0,  
3.579 9.6  
3.573  
3.570  
3.564  
3.554 H-3  
3.540 (dca)  
2.749 2.8  
2.742 18.4  
2.736 dt (H<sub>2</sub>O)  
2.702  
2.695  
2.690  
2.255  
2.245  
2.230  
2.220  
2.209  
2.199  
2.184  
2.174  
1.578  
1.562  
1.364  
1.348

Supplementary Material (ESI) for Organic & Biomolecular Chemistry  
This journal is (c) The Royal Society of Chemistry 2009

|        |   |
|--------|---|
| EXPNO  | 1 |
| PROCNO | 1 |

|    |            |
|----|------------|
| 7E | 500.0      |
| 01 | 0.10000000 |

|      |             |
|------|-------------|
| PL1  | 2.20        |
| 6501 | 100 1221007 |

PC 0.80

|       |         |
|-------|---------|
| PPMCM | 0.59091 |
|-------|---------|

mp-120-122°C

$$[\Delta]_{D}^{20} (C_2O \cdot 0.11, CHCl_3) = +435.2$$
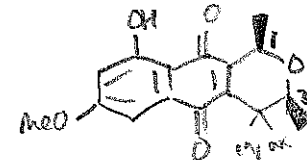

Ventiloquinone L

### Integral

1,000

0336

1.0706

1103

1.5213

.1586

2110

2398

6521

6913

ppm 12 11 10 9 8 7 6 5 4 3 2 1

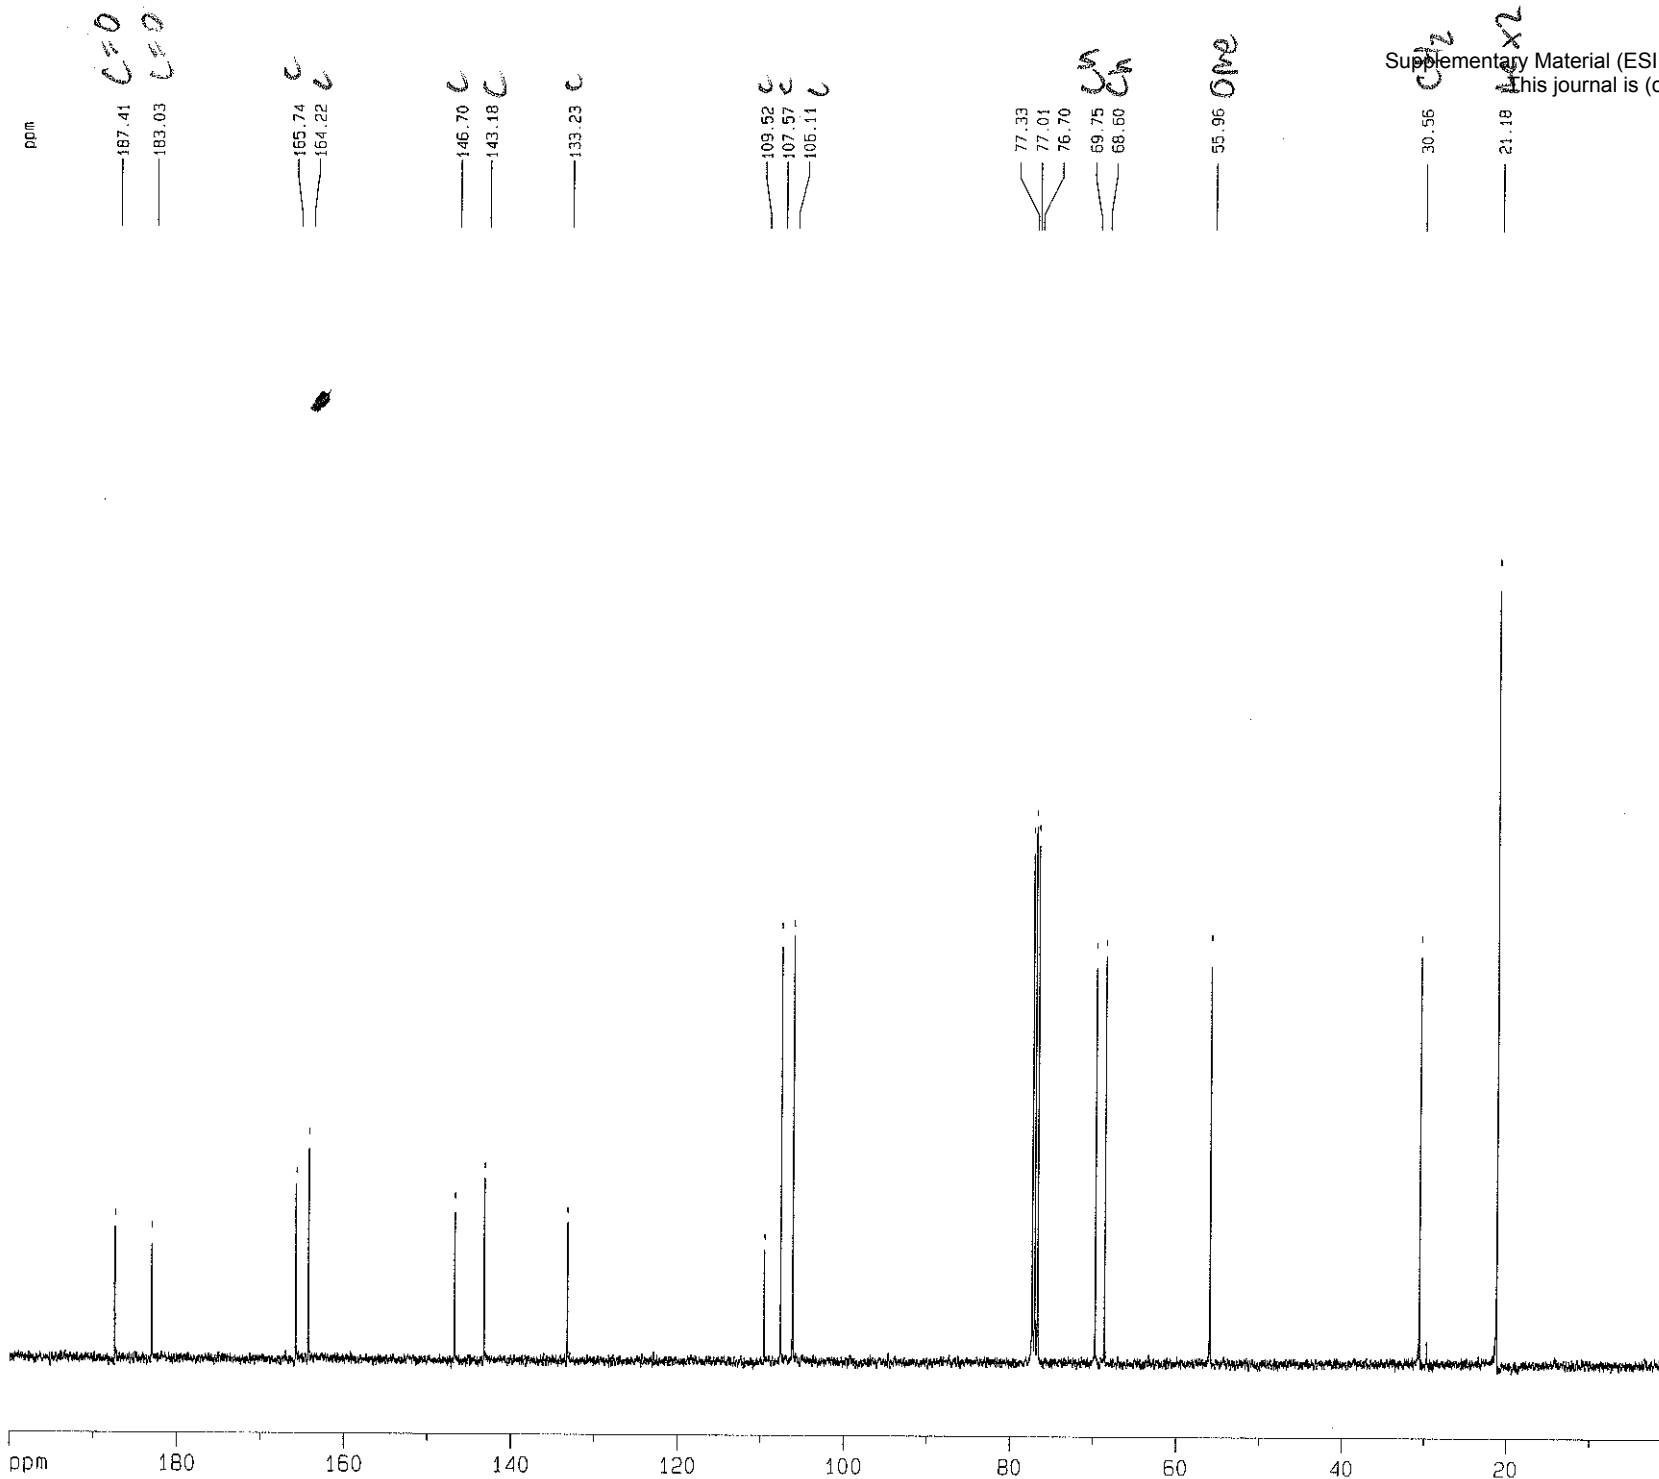

Supplementary Material (ESI) for Organic & Biomolecular Chemistry  
This journal is (c) The Royal Society of Chemistry 2009

Current Data Parameters  
NAME fs034f1  
EXPNO 2  
PROCNO 1

F2 - Acquisition Parameters  
Date\_ 20080625  
Time 7.21  
INSTRUM spect  
PROBHD 5 mm BBO BB-1H  
PULPROG zgpg30  
TD 65536  
SOLVENT CDCl3  
NS 1500  
DS 0  
SWH 24036.451 Hz  
FIDRES 0.366798 Hz  
AQ 1.3631988 sec  
RG 6502  
DH 20.800 usec  
DE 6.50 usec  
TE 300.0 K  
D1 0.63167691 sec  
d11 0.03000000 sec  
d12 0.00002000 sec

===== CHANNEL f1 =====  
NUC1 13C  
P1 9.00 usec  
PL1 -1.50 dB  
SF01 100.6238978 MHz

===== CHANNEL f2 =====  
CPDPRG2 waltz16  
NUC2 1H  
PCPD2 100.00 usec  
PL2 2.20 dB  
PL12 19.10 dB  
PL13 22.10 dB  
SF02 400.1318006 MHz

F2 - Processing parameters  
SI 32768  
SF 100.6127724 MHz  
WDW EM  
SSB 0  
LB 2.00 Hz  
GB 0  
PC 0.80

1D NMR plot parameters  
CX 22.00 cm  
CY 10.46 cm  
F1P 200.000 ppm  
F1 20122.55 Hz  
F2P -0.000 ppm  
F2 -0.00 Hz  
PPMCM 9.09091 ppm/cm  
HZCM 914.66156 Hz/cm

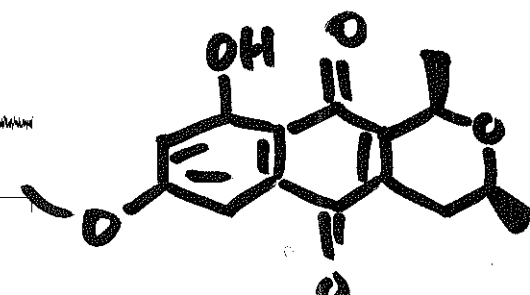

JS-53 f11-18

(R<sub>f</sub> 0.42, EtOAc)

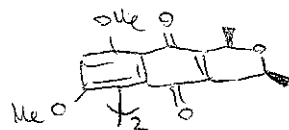

Supplementary Material (ESI) for Organic & Biomolecular Chemistry  
This journal is (c) The Royal Society of Chemistry 2009

Pure αR  
atropisomer

6.757

4.836  
4.826  
4.824  
4.814  
4.804  
4.802  
4.793  
4.052  
3.739  
3.512  
3.503  
3.491  
3.482  
3.478  
3.468  
3.457  
3.448  
3.445  
2.539  
2.530  
2.521  
2.478  
2.470  
2.461  
2.022  
2.009  
1.988  
1.975  
1.961  
1.949  
1.927  
1.915  
1.569  
1.547  
1.270  
1.249

Current Data Parameters  
NAME jsej53\_f11-18  
EXPNO 1  
PROCNO 1

F2 - Acquisition Parameters  
Date\_ 20080217  
Time\_ 15.17  
INSTRUM spect  
PROBHD 5 mm QNP 1H/13  
PULPROG zg30  
TD 32768  
SOLVENT  
NS 64  
DS 0  
SWH 5995.204 Hz  
FIDRES 0.182959 Hz  
AQ 2.7329011 sec  
RG 456.1  
DW 83.400 usec  
DE 6.00 usec  
TE 300.2 K  
D1 0.10000000 sec  
TDO 1

===== CHANNEL f1 =====  
NUC1 1H  
P1 11.90 usec  
PL1 1.90 dB  
SFO1 300.1315006 MHz

F2 - Processing parameters  
SI 16384  
SF 300.1300057 MHz  
WDW EM  
SSE 0  
LB 0.10 Hz  
GB 0  
PC 0.80

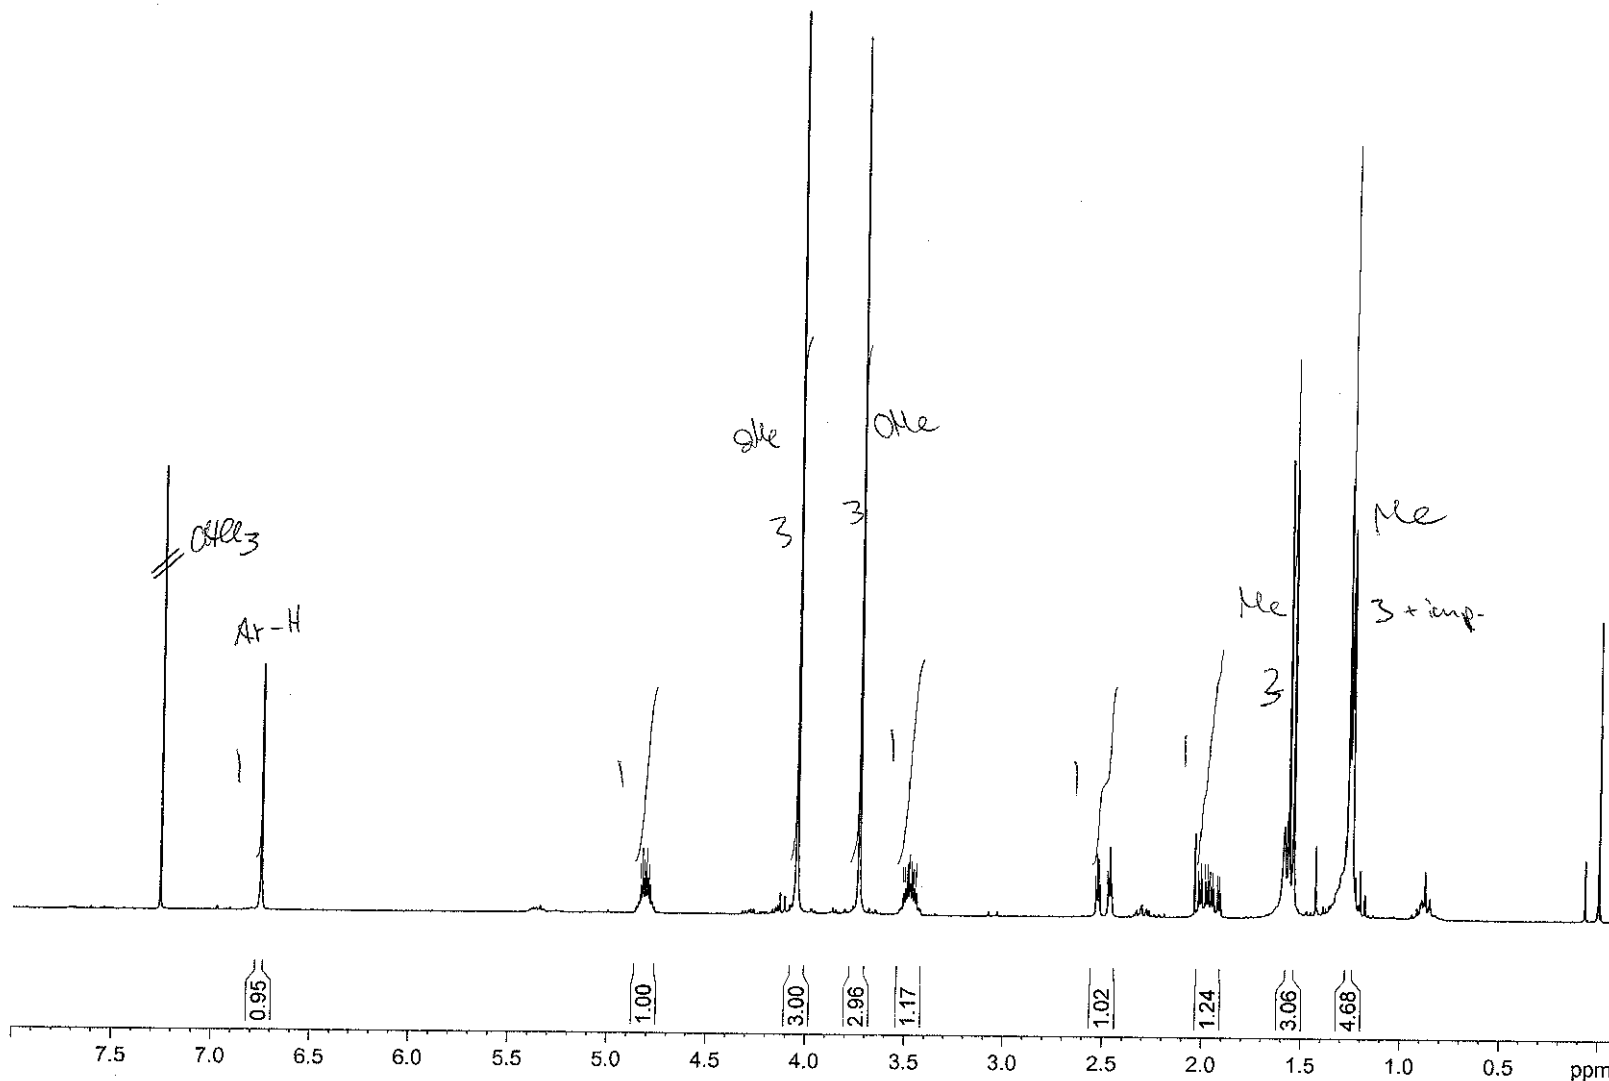



JS-53 f11-18

PURE  $\alpha$ R  
atropisomers

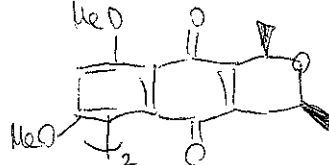

Supplementary Material (ESI) for Organic & Biomolecular Chemistry  
This journal is (c) The Royal Society of Chemistry 2009

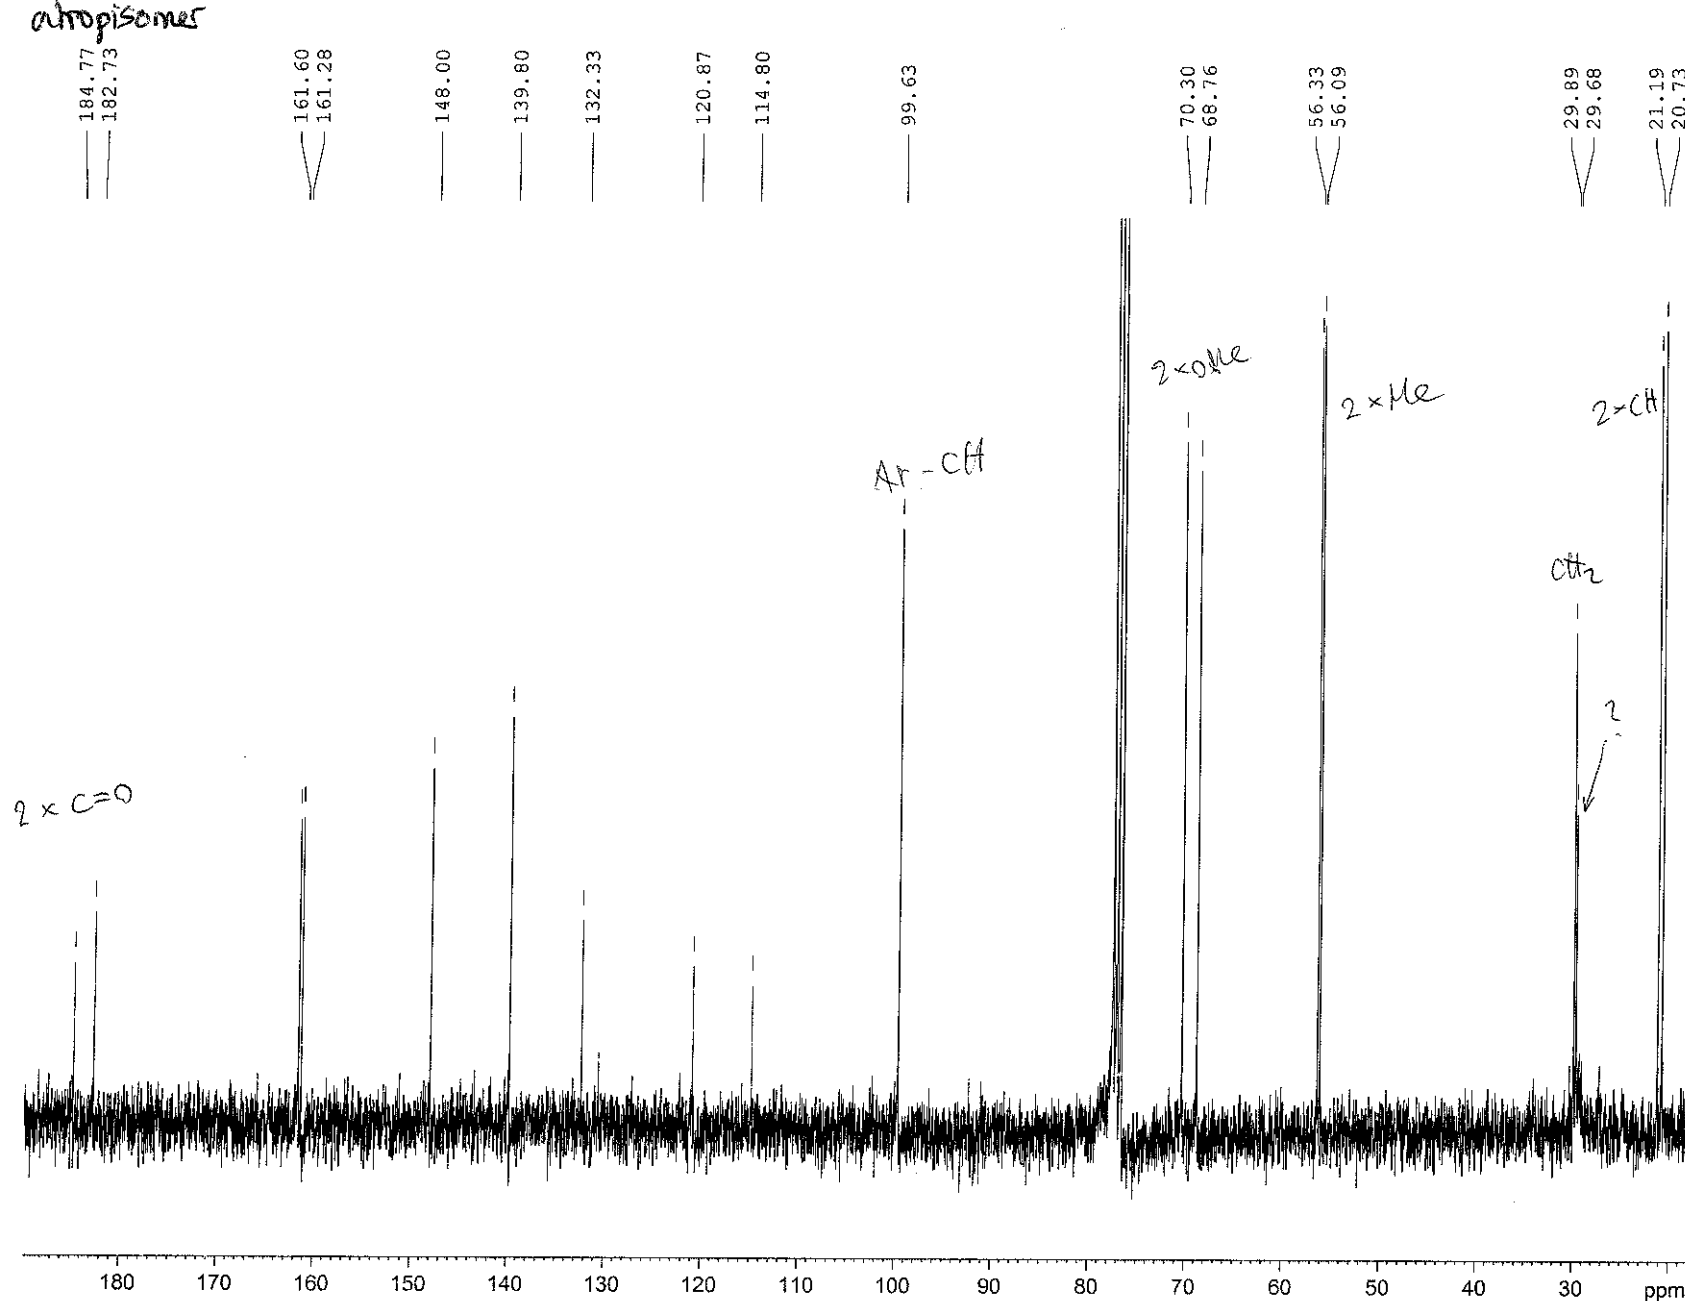

Current Data Parameters  
NAME jsej53\_f11-18  
EXPNO 3  
PROCNO 1

F2 - Acquisition Parameters  
Date 20080217  
Time 15.51  
INSTRUM spect  
PROBHD 5 mm QNP 1H/13  
PULPROG zgpg  
TD 65536  
SOLVENT  
NS 1500  
DS 0  
SWH 17985.611 Hz  
FIDRES 0.274439 Hz  
AQ 1.8219508 sec  
RG 16384  
DW 27.800 usec  
DE 20.00 usec  
TE 300.2 K  
D1 0.17593171 sec  
d11 0.03000000 sec  
DELTA 0.07593171 sec  
TD0 1

===== CHANNEL f1 =====  
NUC1 13C  
P1 5.44 usec  
PL1 4.00 dB  
SFO1 75.4760973 MHz

===== CHANNEL f2 =====  
CPDPRG2 waltz16  
NUC2 1H  
PCPD2 100.00 usec  
PL2 1.90 dB  
PL12 20.80 dB  
PL13 26.40 dB  
SFO2 300.1312005 MHz

F2 - Processing parameters  
SI 32768  
SF 75.4677496 MHz  
WDW EM  
SSB 0  
LB 1.00 Hz  
GB 0  
PC 1.00

JS-53 f28-46

(R<sub>f</sub> 0.35, EtOAc)

atropisomer B  
as  
atropisomer

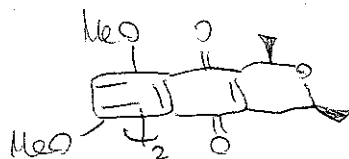

Supplementary Material (ESI) for Organic & Biomolecular Chemistry  
This journal is (c) The Royal Society of Chemistry 2009

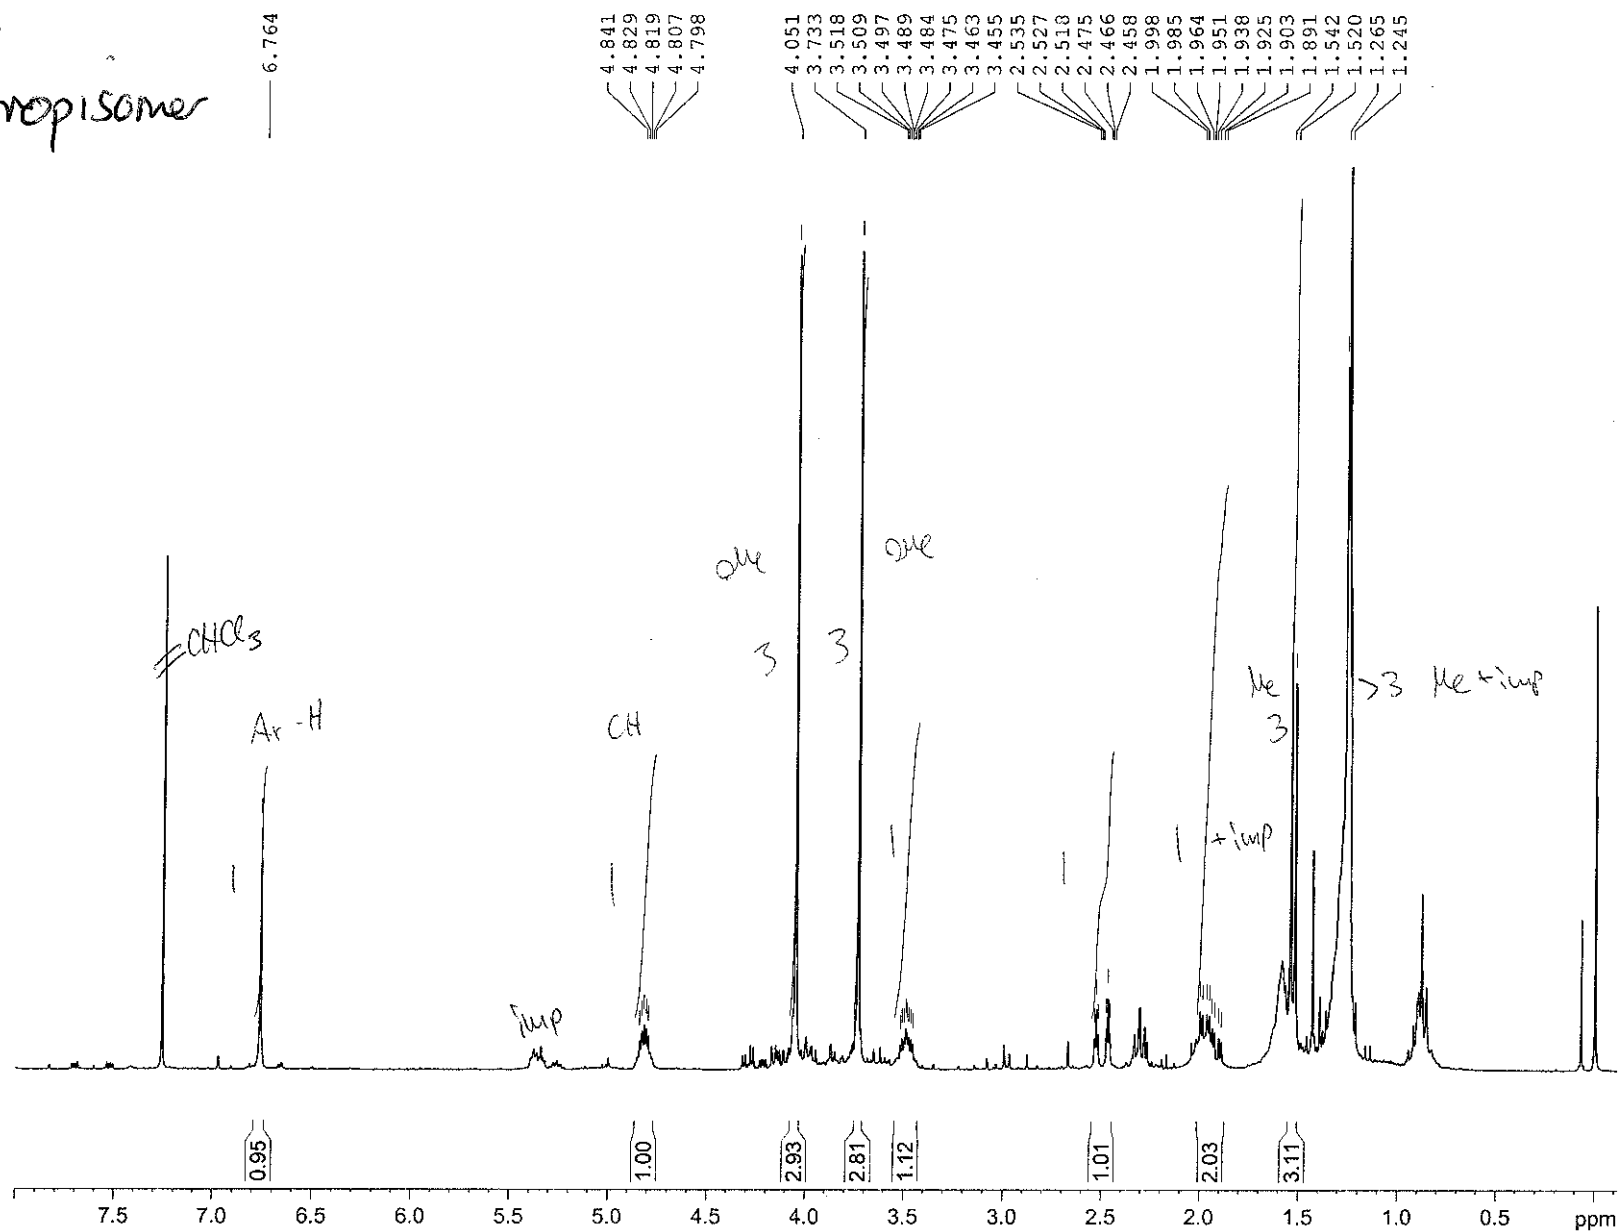

Current Data Parameters  
NAME jsej53\_f28-46  
EXPNO 1  
PROCNO 1

F2 - Acquisition Parameters  
Date\_ 20080217  
Time\_ 16.35  
INSTRUM spect  
PROBHD 5 mm QNP 1H/13  
PULPROG zg30  
TD 32768  
SOLVENT  
NS 64  
DS 0  
SWH 5995.204 Hz  
FIDRES 0.182959 Hz  
AQ 2.7329011 sec  
RG 406.4  
DW 83.400 usec  
DE 6.00 usec  
TE 300.2 K  
D1 0.10000000 sec  
TDO 1

===== CHANNEL f1 =====  
NUC1 1H  
P1 11.90 usec  
PL1 1.90 dB  
SFO1 300.1315006 MHz

F2 - Processing parameters  
SI 16384  
SF 300.1300057 MHz  
WDW EM  
SSB 0  
LB 0.10 Hz  
GB 0  
PC 0.80

JS-53f28-46  
aS atropisomer

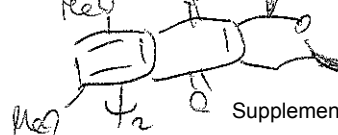

Supplementary Material (ESI) for Organic & Biomolecular Chemistry  
This journal is (c) The Royal Society of Chemistry 2009

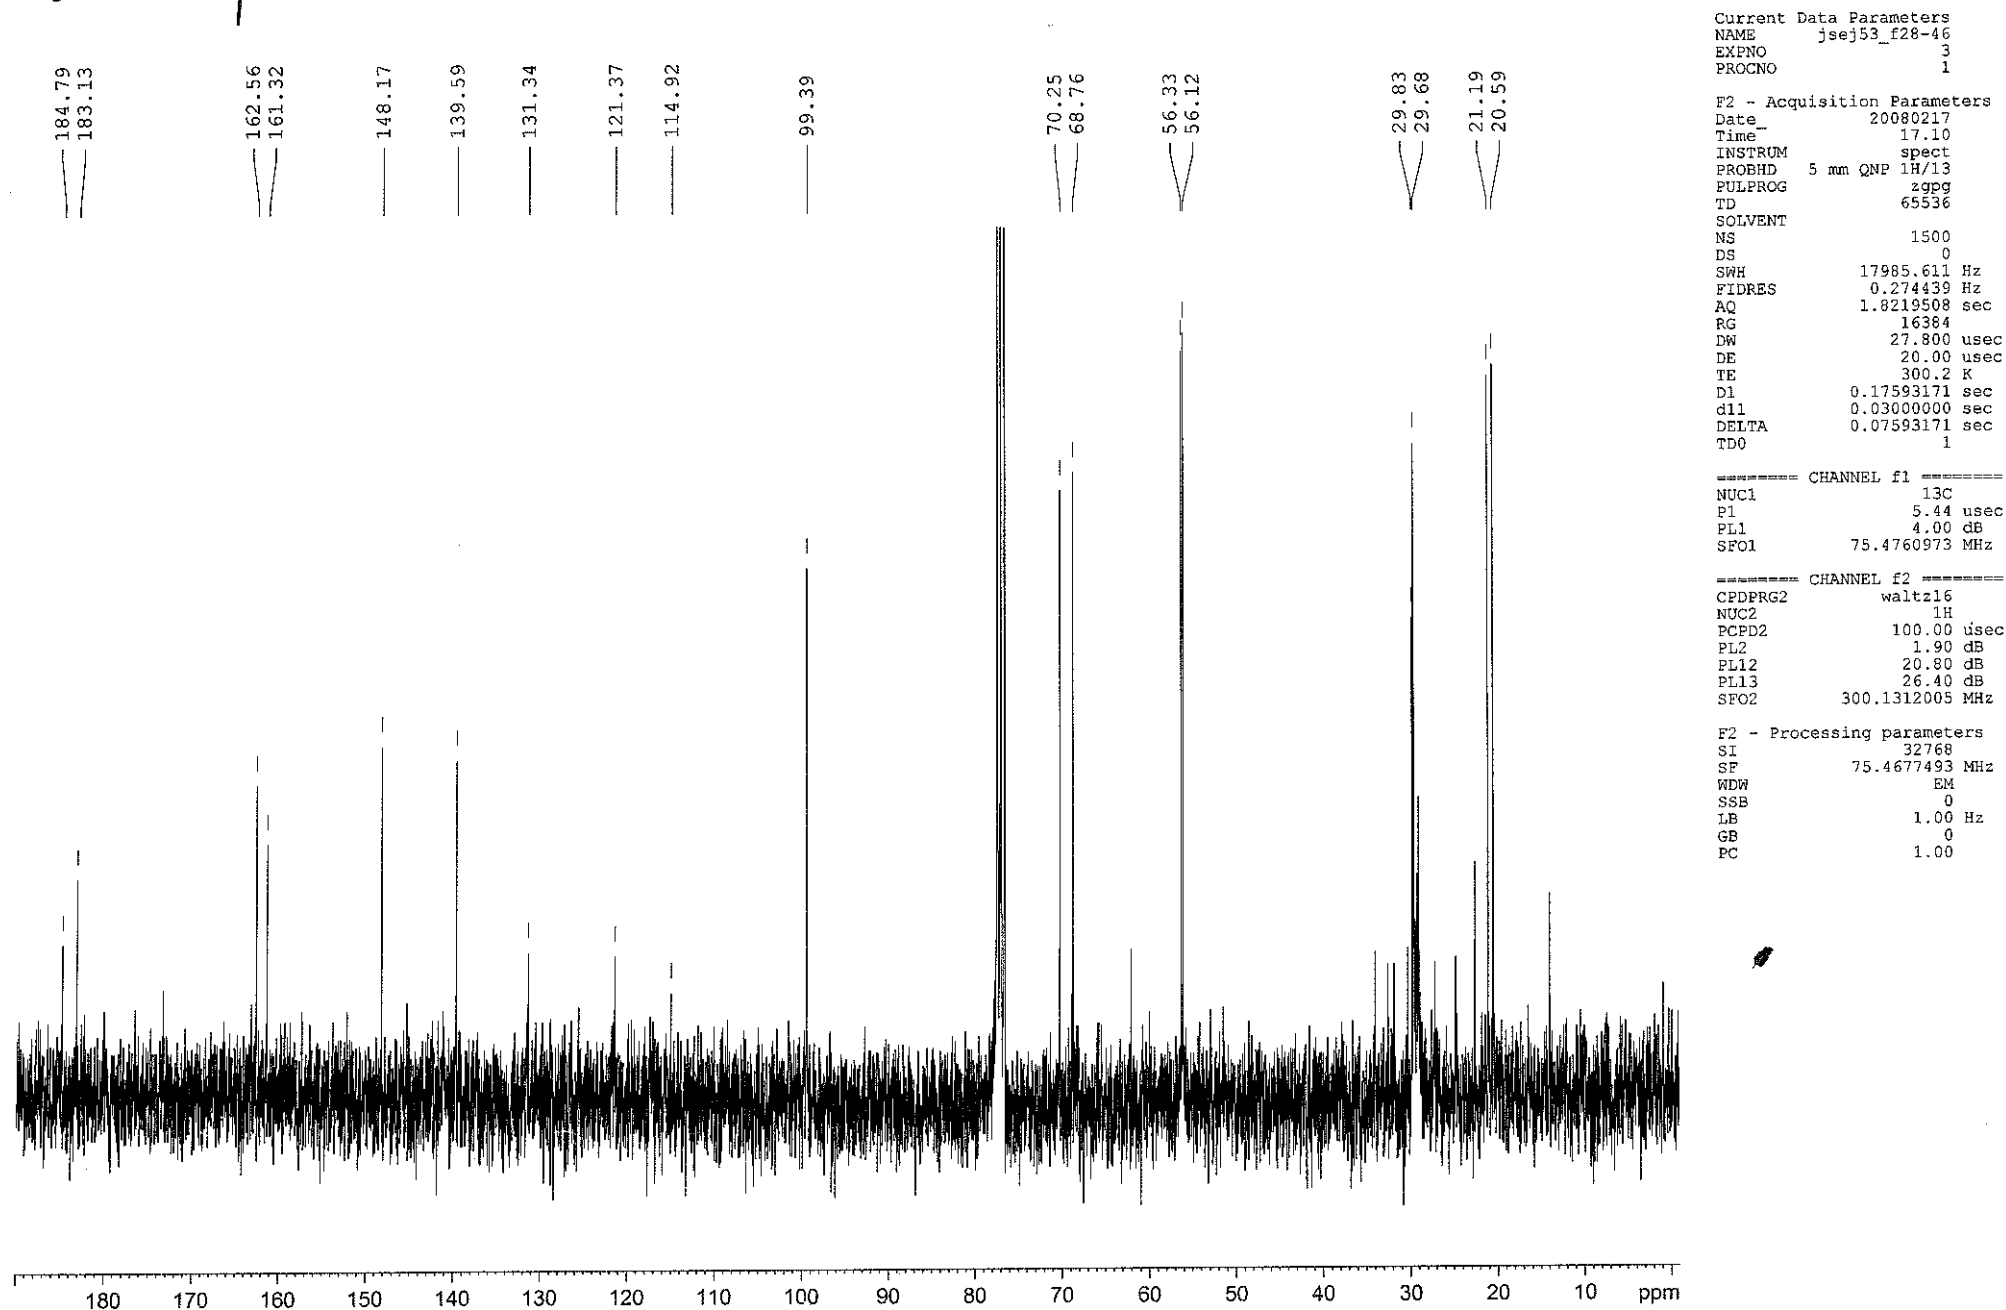

NOESY T<sub>mix</sub> = 800 ms

(atropisomer B)  
aJ atropisome

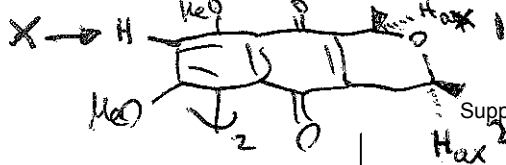

Supplementary Material (ESI) for Organic & Biomolecular Chemistry  
This journal is (c) The Royal Society of Chemistry 2009

Current Data Parameters  
NAME jsej53\_f28-46  
EXPNO 4  
PROCNO 1

F2 - Acquisition Parameters  
Date\_ 20080219  
Time\_ 14.20  
INSTRUM spect  
PROBHD 5 mm QNP 1H/13  
PULPROG noesygpphpp.rak  
TD 2048  
SOLVENT  
NS 5  
DS 16  
SWH 5995.204 Hz  
FIDRES 2.927346 Hz  
AQ 0.1708532 sec  
RG 57  
DW 83.400 usec  
DE 6.00 usec  
TE 300.2 K  
d0 0.00006825 sec  
D1 1.00000000 sec  
D8 0.80000001 sec  
D11 0.03000000 sec  
d12 0.00002000 sec  
d30 0.79895002 sec  
IN0 0.00016680 sec

===== CHANNEL f1 =====  
NUC1 1H  
P1 11.90 usec  
P17 2500.00 usec  
PL1 1.90 dB  
PL10 9.90 dB  
SFO1 300.1315007 MHz

===== GRADIENT CHANNEL =====  
GPNAM1 sine.100  
GPZ1 17.00 %  
P16 1000.00 usec

F1 - Acquisition parameters  
ND0 1  
TD 235  
SFO1 300.1315 MHz  
FIDRES 25.511505 Hz  
SW 19.975 ppm  
FhMODE TPPI

F2 - Processing parameters  
SI 1024  
SF 300.1300069 MHz  
WDW QSINE  
SSB 2  
LB 0.00 Hz  
GB 0  
PC 0.80

F1 - Processing parameters  
SI 256  
MC2 TPPI  
SF 300.1300069 MHz  
WDW QSINE  
SSB 2  
LB 0.00 Hz  
GB 0

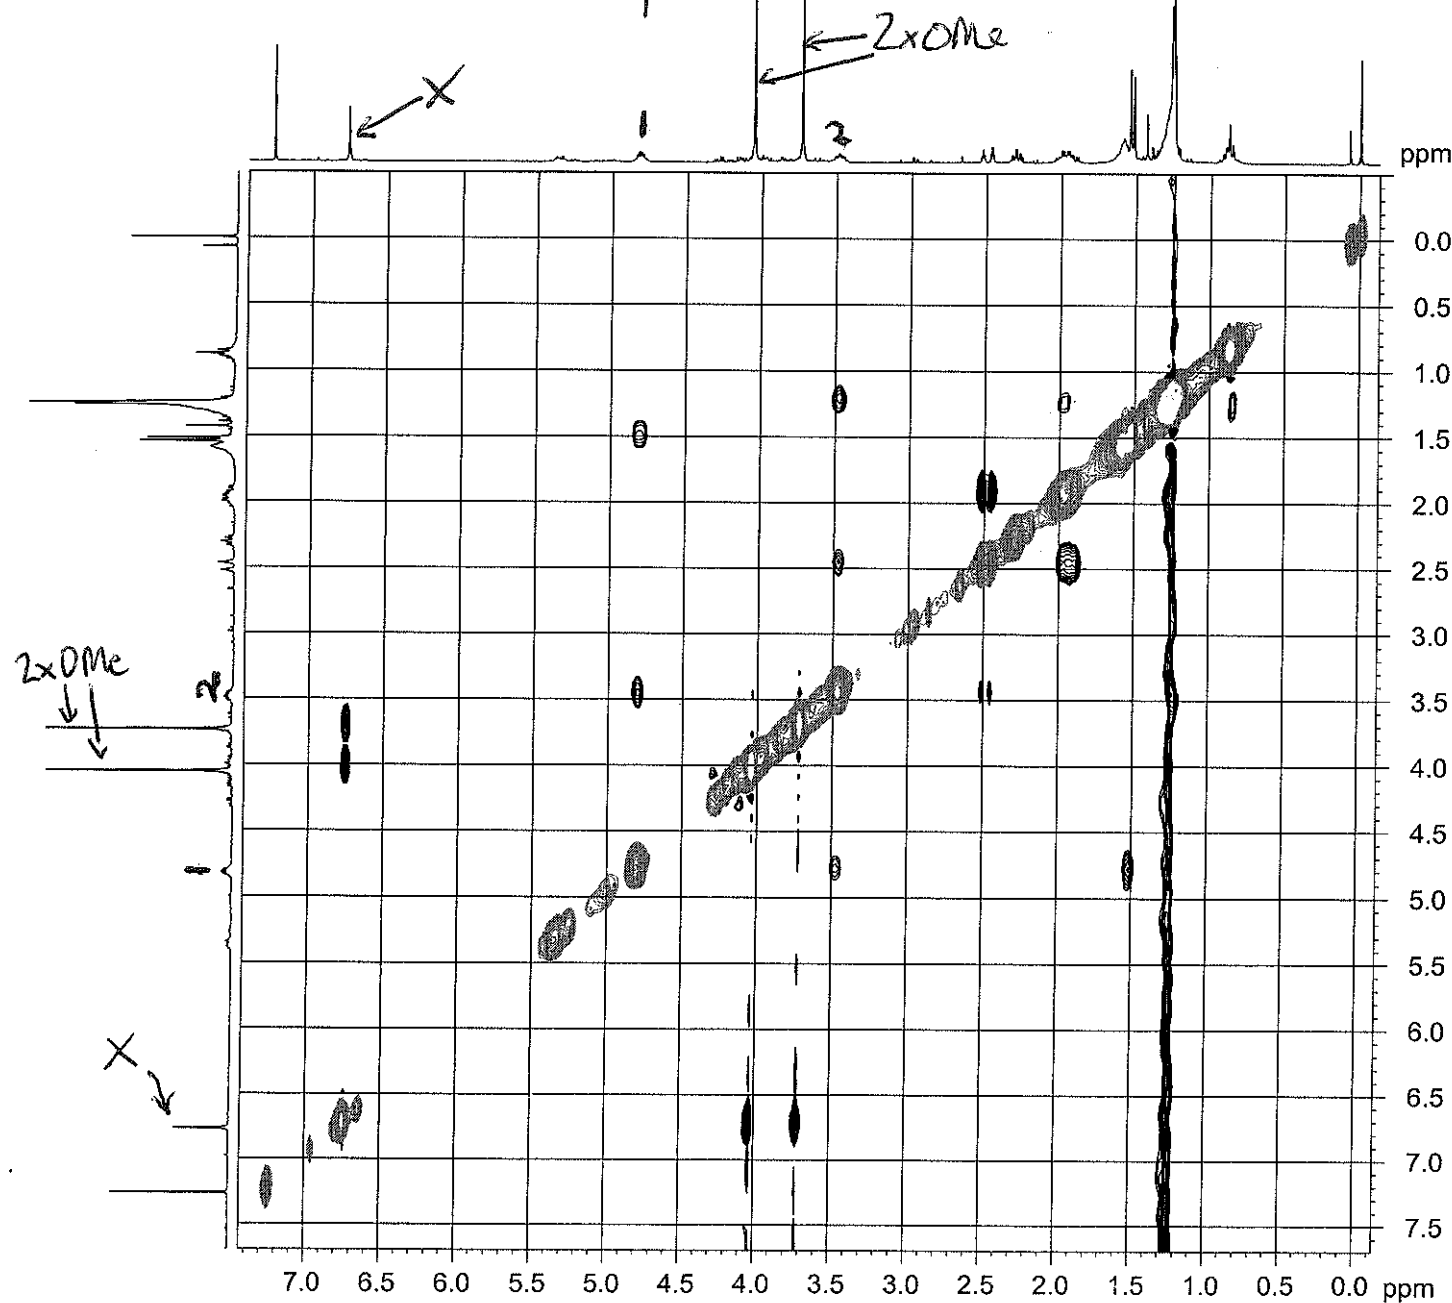

Supplement: b905077a.pdf [file b905077a.pdf]
